# Supplementary material for: Ophthalmic nurses’ knowledge, attitude, and practice toward venous thromboembolic prevention: a dual-center cross-sectional survey
Source: PeerJ. 2023 Aug 28;11:e15947. doi: 10.7717/peerj.15947 (PMC10470452; doi:10.7717/peerj.15947)
Supplement: Supplemental Information 1 [file peerj-11-15947-s001.xlsx]

## Sheet: Sheet1
Sample No.	Time (minutes)	1.Gender	2.Age (years)	3.Province	3.City	4.Hospital level	5.Hospital type	6.Service years	7.Professional title	8.Highest education attained	9.Position	10.Department	11.Previous VTE prevention training	12(Hospital or department training )	12(Out-of-hospital training or academic conferences)	12(Guideline or literature reading )	12(Internet)	12(School education)	12(Other)	13.VTE prevention management in hospital	14.Previous VTE nursing experience	K1. VTE comprise deep vein thrombosis (DVT) and pulmonary embolism (PE).	K2. Dyspnea, chest pain, syncope and shock are the main clinical manifestations of acute PE.	K3. The main causes of VTE are venous stasis, blood hypercoagulability and vascular wall injury.	K4. Post-thrombotic syndrome is the most severe complication of DVT.	K5. DVT often occurs in the lower limbs.	K6. After acute DVT of the legs, the patient 's lower limbs will have symptoms such as unilateral leg pain, redness, swelling, edema, warmth, and tenderness.	K7. Compression ultrasonography is the first-line imaging test for patients with a suspected first DVT.	K8. The Caprini risk assessment model of high VTE risk partition is 3 ~ 4 points	K9. Raising the lower limbs after surgery has no effect on preventing VTE.	K10. Encouraging early ambulation after surgery may prevent VTE when the condition allows.	K11. Giving up smoking and drinking has no effect on preventing VTE.	K12. Avoiding venipuncture of lower limbs is ineffective in preventing VTE.	K13. Physical methods to prevent VTE include graduated compression stockings, intermittent pneumatic compression devices and plantar venous pumps.	K14. Physical prevention of VTE can be used for patients with congestive heart failure and severe edema of lower limbs.	K15. When measuring the circumference of the lower limbs of the patients, the skin ruler, location and time should be monitored.	K16. Ankle pump exercise can effectively prevent DVT.	K17. Patients with DVT of lower limbs need to massage or hot compress the affected limb.	K18. Infection is the most common complication after using anticoagulants.	K19. Older age is a risk factor for VTE.	K20. Obesity is not a risk factor for VTE.	K21. Bedridden is not a risk factor for VTE.	K22. Recent surgery is a risk factor for VTE.	K23. Pregnancy or puerperium is a risk factor for VTE.	K24. Oral contraceptives or hormone replacement therapy are not risk factors for VTE.	K25. Personal or family history of VTE is a risk factor for VTE.	K26. Calf swelling or varicose veins are risk factors for VTE.	K27. Active cancer is not a risk factor for VTE.	A1. Do you think VTE will increase the risk of nursing and even lead to medical disputes?
001	363	1	33	Hunan	Changsha	1	1	2	2	3	1	1	1	1	1	1	1	0	0	1	1	1	1	1	2	1	1	1	1	2	1	2	2	1	2	1	1	2	2	1	2	2	1	1	2	1	1	2	1
002	430	1	30	Hunan	Changsha	1	1	2	2	3	1	1	1	1	1	1	1	0	0	1	1	1	1	1	2	1	1	1	1	2	1	2	2	1	2	1	1	2	2	1	2	2	1	1	2	1	1	2	1
003	272	1	38	Hunan	Changde	1	1	4	3	2	2	2	1	1	1	0	0	0	0	1	2	1	1	1	1	1	1	1	1	1	1	2	1	1	1	1	3	2	2	1	2	2	3	1	1	1	1	2	1
004	525	1	44	Hunan	Changde	2	1	4	3	2	2	1	1	0	1	0	1	0	1	2	2	1	1	1	3	1	1	1	1	2	1	2	2	1	3	1	3	2	1	3	2	2	1	1	3	3	1	2	2
005	462	1	40	Hunan	Hengyang	1	1	4	2	2	1	1	1	1	0	1	1	0	0	1	2	1	1	1	1	1	1	1	1	2	1	2	2	1	1	1	1	2	2	1	2	1	1	1	1	1	1	2	1
006	174	1	36	Hunan	Changde	1	1	4	2	2	1	1	1	1	0	1	1	0	0	1	2	1	1	1	1	1	1	1	1	2	1	2	1	1	1	1	1	1	1	1	1	1	1	1	1	1	1	1	1
007	420	1	35	Hunan	Changsha	1	2	3	2	2	1	1	1	1	0	0	0	0	0	1	2	3	1	1	1	1	1	1	1	2	1	1	2	1	1	1	1	2	3	1	2	2	1	1	2	1	1	2	1
008	723	1	30	Hunan	Changde	1	1	3	1	2	1	1	1	1	0	1	1	0	0	1	2	1	1	1	2	1	1	1	1	2	1	2	2	1	1	1	1	2	3	1	2	2	1	1	2	1	1	1	1
009	347	1	44	Hunan	Changsha	1	1	4	3	2	2	1	1	1	1	0	0	0	0	1	1	1	1	1	1	1	1	1	1	2	1	2	2	1	1	1	1	2	2	1	2	2	1	1	3	1	1	2	2
010	393	1	30	Hunan	Changde	1	1	2	1	2	1	1	2	1	1	0	0	0	0	1	2	1	1	1	1	1	1	1	1	2	1	2	2	1	1	1	1	2	1	1	1	2	1	1	1	1	1	2	1
011	416	1	25	Hunan	Changsha	2	1	1	1	2	1	1	1	1	0	0	0	0	0	1	2	1	3	1	1	1	1	1	1	2	1	2	2	1	1	1	1	2	1	1	2	2	1	1	2	1	1	2	1
012	385	1	31	Hunan	Changde	1	2	2	1	2	1	1	1	1	0	0	0	0	0	1	2	1	1	1	1	1	1	1	1	2	1	2	2	1	1	1	1	2	1	1	2	2	1	1	3	1	1	2	1
013	302	1	37	Hunan	Changde	1	1	3	2	2	1	1	2	1	1	1	1	1	0	1	2	1	1	1	1	1	1	1	1	2	1	2	2	1	1	1	1	1	1	1	2	1	1	1	1	1	1	1	1
014	566	1	37	Hunan	Changde	2	1	3	2	2	1	1	2	1	0	0	1	0	0	2	2	1	1	1	2	1	1	1	1	2	1	2	1	1	2	1	3	2	3	1	2	2	3	1	2	1	2	3	4
015	488	1	27	Hunan	Changsha	2	1	1	1	1	1	1	2	0	0	0	0	0	1	1	2	1	1	1	1	1	1	1	1	2	2	2	2	1	1	1	3	2	1	2	1	2	1	1	2	1	2	3	3
016	368	1	45	Hunan	Changde	1	1	4	3	2	2	1	1	1	0	1	0	0	0	1	1	1	1	1	1	1	1	1	1	2	2	1	2	1	1	1	1	2	2	1	2	1	1	1	3	1	1	2	1
017	767	1	48	Hunan	Changde	1	1	4	3	2	2	1	1	1	1	1	0	0	0	1	2	1	1	1	1	1	1	1	1	2	1	2	2	1	1	1	1	1	1	1	2	2	1	1	2	1	1	2	1
018	463	1	40	Hunan	Changde	2	2	4	3	2	2	3	1	0	1	0	0	0	0	2	2	1	1	1	1	1	1	1	1	1	1	2	2	1	2	1	1	2	1	1	2	2	1	1	2	1	1	3	1
019	353	1	52	Hunan	Changde	1	2	4	3	2	1	2	1	1	0	0	0	0	1	1	2	3	1	1	1	1	1	1	1	3	3	3	3	3	3	3	1	3	2	1	3	3	1	1	1	1	1	1	1
020	281	1	31	Hunan	Changde	1	1	2	1	2	1	1	1	1	0	0	0	0	0	1	2	1	1	1	1	1	1	1	1	2	1	1	1	1	1	1	1	1	3	1	2	1	1	1	1	1	1	1	1
021	441	1	29	Hunan	Changde	2	2	2	1	2	1	2	1	1	0	1	0	0	0	2	2	1	1	1	1	1	1	1	1	2	1	2	2	1	2	1	1	2	2	1	2	2	3	1	2	1	1	2	1
022	282	1	23	Hunan	Changde	1	1	1	1	2	1	1	1	1	1	0	1	0	0	1	2	1	1	1	2	1	1	1	1	2	1	2	1	1	1	1	1	2	1	1	2	2	1	1	2	1	1	2	2
023	320	1	30	Hunan	Changde	1	1	2	1	2	1	1	1	1	0	0	0	1	1	1	2	1	1	1	1	1	1	1	1	3	1	1	1	1	1	1	1	2	2	1	2	2	3	1	2	1	1	3	2
024	239	1	36	Hunan	Changde	1	1	3	2	2	1	1	1	1	1	1	1	1	1	1	1	1	1	1	1	1	1	1	1	2	2	2	1	1	1	1	1	2	1	1	2	1	1	1	1	1	1	1	1
025	252	1	30	Hunan	Changsha	1	1	2	1	2	1	1	1	1	0	0	0	0	0	1	2	1	1	1	1	1	1	1	1	2	1	2	2	1	1	1	1	2	2	1	2	2	1	1	2	1	1	2	2
026	263	1	36	Hunan	Changde	1	1	4	2	2	1	1	1	1	0	0	0	0	0	1	2	1	1	1	1	1	1	1	1	1	1	2	2	1	1	1	1	2	2	1	2	2	1	1	2	1	1	2	1
027	285	1	30	Hunan	Changde	1	1	2	1	2	1	1	1	1	0	1	1	0	0	1	2	1	1	1	1	1	1	1	1	1	1	1	1	1	1	1	1	1	1	1	1	1	1	1	1	1	1	1	1
028	592	1	32	Hunan	Changde	3	2	2	2	2	1	3	2	0	0	0	1	0	0	2	2	1	1	1	1	2	1	1	1	2	1	2	2	1	1	1	1	1	3	1	3	2	1	1	2	1	1	2	1
029	689	1	28	Hunan	Changde	1	1	2	1	1	1	1	1	1	0	0	0	0	0	1	2	1	1	1	1	1	1	1	1	2	1	2	2	1	1	1	1	2	1	1	2	2	1	1	2	1	1	3	1
030	235	1	26	Hunan	Changde	1	1	1	1	2	1	1	2	1	1	0	0	0	0	1	2	1	1	1	1	3	1	1	1	2	1	2	2	1	1	1	1	2	2	1	2	1	1	1	2	1	1	2	1
031	845	1	33	Hunan	Changde	1	1	3	2	2	1	1	1	1	0	1	0	0	1	1	1	2	2	1	1	1	1	1	1	2	1	2	2	1	1	1	1	1	1	1	2	2	1	1	1	1	1	2	2
032	285	1	30	Hunan	Changde	1	1	2	2	2	1	1	1	1	0	0	1	0	0	1	2	1	1	1	3	2	1	1	1	1	2	2	2	1	3	1	3	2	1	1	2	2	1	1	3	1	1	3	2
033	514	1	32	Hunan	Xiangtan	1	1	3	1	2	1	1	1	1	0	0	1	0	0	1	2	1	1	1	1	1	1	1	1	2	1	2	2	1	2	1	1	2	2	1	2	2	1	1	2	1	1	2	1
034	1012	1	31	Hunan	Changde	3	2	2	1	2	1	2	1	1	0	0	0	0	0	1	2	1	1	1	1	1	1	1	1	1	1	2	3	3	3	1	3	2	1	2	3	2	2	3	1	1	1	3	1
035	760	1	43	Hunan	Shaoyang	2	1	4	2	1	1	1	2	1	0	0	0	0	0	1	2	2	1	1	1	1	1	1	1	2	1	2	2	1	3	1	1	2	2	2	3	2	1	1	1	1	1	2	2
036	396	1	29	Hunan	Changde	1	1	2	1	2	1	1	1	1	0	1	0	0	0	1	1	1	1	1	1	1	1	1	1	2	1	2	2	1	1	1	1	2	1	1	2	2	2	1	2	1	1	2	1
037	508	1	35	Hunan	Changsha	1	1	3	2	1	1	1	1	1	0	0	0	0	0	1	1	1	1	1	1	1	1	1	1	2	1	2	2	1	1	1	1	2	3	1	2	2	1	1	3	1	1	2	1
038	290	1	31	Hunan	Changde	1	1	2	2	2	1	1	1	1	0	1	1	1	0	1	2	1	1	1	1	1	1	1	1	2	1	2	2	1	2	1	1	2	2	1	2	2	1	1	2	2	1	2	1
039	363	1	33	Hunan	Changde	1	1	2	1	2	1	1	2	0	1	1	1	1	0	2	2	1	1	1	1	1	1	2	1	2	1	2	2	1	1	1	1	2	3	1	2	1	1	1	2	1	1	2	1
040	252	1	29	Hunan	Changde	1	1	3	2	2	1	1	1	1	0	0	0	0	0	1	2	3	1	1	1	1	1	1	1	2	1	2	2	1	1	3	1	1	1	1	2	2	1	1	2	1	1	2	1
041	453	1	33	Hunan	Changde	1	1	3	1	2	2	1	2	1	1	0	1	1	0	1	2	1	1	1	1	1	1	1	1	2	1	2	2	1	1	1	1	2	2	1	2	2	1	2	3	3	1	1	1
042	408	1	29	Hunan	Changde	1	1	2	2	2	1	1	1	1	0	0	0	0	0	1	2	1	1	1	2	1	1	1	1	2	1	2	2	1	1	1	1	2	2	1	2	2	1	1	2	1	1	2	1
043	360	1	30	Hunan	Changde	2	1	2	1	2	1	1	1	1	0	0	0	0	0	1	2	1	1	1	1	1	1	1	1	2	1	2	2	1	2	1	1	2	1	1	2	2	1	1	2	1	1	2	1
044	585	1	26	Hunan	Loudi	1	1	1	1	2	1	1	1	1	0	0	0	0	0	1	2	1	1	1	1	1	1	1	1	2	1	2	2	1	3	1	1	2	2	1	2	2	1	1	1	1	1	1	2
045	711	1	33	Hunan	Shaoxing	1	1	2	1	2	1	1	1	1	1	1	1	0	0	1	2	1	1	1	1	1	1	1	1	2	1	1	2	1	2	1	1	2	2	1	2	2	1	1	2	1	1	2	1
046	1067	1	23	Hunan	Taizhou	1	1	1	1	2	1	1	1	1	0	1	1	0	0	1	2	1	1	1	2	1	1	1	1	2	1	2	2	1	1	1	1	2	2	1	2	2	1	1	2	1	1	1	2
047	373	1	24	Hunan	Shaoxing	2	1	1	1	1	1	1	1	1	1	1	1	1	0	1	2	1	1	1	1	1	1	1	1	3	1	1	2	1	1	1	1	2	3	1	2	2	1	1	2	1	1	2	3
048	280	1	40	Hunan	Wenzhou	1	1	4	2	2	1	1	1	0	0	0	1	0	0	1	2	1	1	1	1	1	1	1	1	2	1	1	3	1	1	1	1	1	1	3	2	2	3	1	1	1	3	1	2
049	366	1	29	Hunan	Wenzhou	1	1	2	1	2	1	1	1	1	0	0	0	0	0	1	2	1	1	1	1	1	1	1	1	1	1	1	1	1	1	1	1	1	3	1	1	2	1	1	2	2	1	2	2
050	458	1	24	Hunan	Wenzhou	1	1	1	1	2	1	1	1	1	0	0	0	0	0	1	2	1	1	1	1	1	1	1	1	2	2	2	2	1	1	1	1	2	2	1	2	2	1	1	2	1	1	2	1
051	365	1	34	Hunan	Changsha	2	1	3	1	2	1	2	2	1	0	0	0	0	0	1	2	3	1	1	1	1	1	1	1	1	1	2	2	1	1	1	1	1	1	1	2	2	1	1	2	1	1	2	1
052	704	1	51	Hunan	Taizhou	1	1	4	3	2	1	1	1	1	0	1	1	0	0	1	2	1	1	1	1	1	1	1	1	2	1	2	2	1	1	1	1	2	3	1	2	2	1	1	2	1	1	2	2
053	697	1	42	Hunan	Wenzhou	2	1	4	2	2	2	1	1	1	1	0	0	0	0	1	2	1	1	1	1	1	1	1	1	2	1	2	2	1	2	1	1	2	2	1	2	2	1	1	2	1	1	2	1
054	457	1	30	Hunan	Changsha	1	1	2	2	2	1	1	1	1	0	0	0	0	0	1	2	1	1	1	2	1	1	1	1	2	1	2	2	1	2	1	1	2	1	1	2	2	1	1	2	1	1	2	1
055	386	1	35	Hunan	Taizhou	1	1	3	2	2	1	1	1	1	0	0	0	0	0	1	2	1	1	1	1	1	2	1	1	2	2	2	2	1	1	1	1	2	2	1	2	2	2	1	2	1	1	2	4
056	738	1	36	Hunan	Taizhou	1	1	4	1	2	1	1	1	1	0	1	1	0	0	1	2	1	1	1	1	1	1	1	1	2	1	2	2	1	1	1	1	2	2	1	2	2	1	1	2	1	1	2	2
057	240	1	26	Hunan	Changsha	1	1	1	1	2	1	1	2	0	0	0	1	0	0	2	2	1	1	1	1	1	1	3	1	2	1	2	1	1	1	1	1	2	1	1	2	2	1	1	1	1	1	1	1
058	497	1	29	Hunan	Taizhou	1	1	2	1	2	1	1	2	1	0	0	1	0	0	1	2	1	1	1	3	1	2	1	1	1	2	2	1	1	3	1	3	2	3	1	2	2	1	1	1	1	1	2	3
059	714	1	25	Hunan	Changsha	1	1	1	1	1	1	1	1	1	0	0	1	0	0	1	2	1	1	1	2	1	1	1	1	2	1	2	2	1	1	1	1	2	1	1	2	2	1	1	2	1	1	2	2
060	364	1	31	Hunan	Wenzhou	1	1	2	1	2	1	1	2	1	0	0	0	0	0	2	2	1	1	1	1	1	1	1	1	1	1	2	1	3	1	1	1	1	1	2	2	1	1	1	1	1	2	1	1
061	728	1	45	Hunan	Wenzhou	2	1	4	2	2	2	1	1	1	1	1	1	0	0	1	2	1	1	1	1	1	1	1	1	2	1	2	2	1	2	1	1	2	2	2	2	2	1	1	3	1	1	2	2
062	417	1	31	Hunan	Loudi	1	1	2	1	2	1	1	1	1	0	1	1	0	0	1	2	1	1	1	2	1	1	1	1	2	1	2	2	1	1	1	1	2	1	1	2	2	1	1	2	1	1	2	1
063	489	1	49	Hunan	Changde	1	1	4	3	2	1	2	2	0	0	1	0	0	0	1	2	3	1	1	3	3	3	1	1	2	1	2	2	1	1	1	1	2	2	1	2	2	1	1	2	1	1	2	4
064	489	1	28	Hunan	Changde	1	1	2	1	2	1	1	1	1	0	0	0	0	0	1	2	1	1	1	2	1	1	1	1	2	1	2	2	1	2	1	1	2	1	1	1	2	1	1	2	1	1	2	1
065	661	1	32	Hunan	Hangzhou	1	1	2	1	2	1	1	1	1	0	0	0	0	0	1	2	1	2	1	1	1	1	1	1	2	1	2	2	1	2	1	1	2	2	2	1	2	1	2	2	2	1	2	2
066	382	1	27	Hunan	Hangzhou	1	1	1	1	2	1	1	1	1	1	0	0	1	0	1	2	1	1	1	1	1	1	1	1	2	1	2	2	1	2	1	1	2	2	1	2	2	1	1	2	2	1	2	2
067	753	1	30	Hunan	Shaoxing	1	1	2	1	2	1	1	1	1	0	0	0	0	0	1	2	1	1	1	1	2	1	2	1	2	1	2	2	1	1	1	2	2	1	1	2	2	2	1	2	1	1	2	3
068	413	1	39	Hunan	Hangzhou	2	1	4	3	2	2	1	1	0	1	0	1	0	0	2	2	3	1	1	1	1	1	1	1	2	1	2	2	1	2	1	1	1	1	1	2	2	1	1	2	1	1	2	1
069	819	1	26	Hunan	Hangzhou	1	1	1	1	2	1	1	1	1	0	0	0	0	0	1	2	2	1	2	2	1	1	1	1	2	1	2	2	1	2	1	1	2	1	1	2	2	1	1	2	1	1	2	2
070	212	1	29	Hunan	Hangzhou	1	1	2	2	2	1	1	1	1	1	1	1	0	0	2	2	1	1	1	1	1	1	1	1	2	1	2	1	1	1	1	1	1	2	1	2	2	1	1	1	1	1	2	1
071	272	1	32	Hunan	Yueyang	1	1	3	2	2	1	1	1	1	0	0	0	0	0	1	2	3	3	1	1	1	1	1	1	2	1	2	2	1	1	1	1	2	3	1	2	2	1	1	2	1	1	2	1
072	273	1	28	Hunan	Yueyang	1	1	2	1	2	1	1	2	1	0	1	0	0	0	1	2	1	1	1	2	1	1	1	1	2	1	2	1	1	2	1	1	2	3	1	2	2	1	1	2	1	1	2	2
073	404	1	27	Hunan	Changsha	2	1	1	1	2	1	1	1	1	0	1	0	0	0	1	2	1	1	1	1	1	1	1	1	2	1	2	2	1	1	1	1	2	2	2	2	2	1	1	2	1	1	2	1
074	326	1	32	Hunan	Taizhou	2	1	3	2	2	1	1	1	1	0	0	0	0	0	1	2	1	1	1	1	1	1	1	1	2	1	2	2	1	2	1	1	2	2	1	2	2	1	1	1	2	1	2	1
075	919	1	38	Hunan	Taizhou	1	1	4	3	2	2	1	1	1	1	1	0	0	0	1	1	1	1	1	1	1	1	1	1	2	1	2	2	1	1	1	1	2	1	1	2	2	1	1	2	1	1	2	1
076	632	1	40	Hunan	Taizhou	2	1	4	2	2	2	1	1	1	0	0	0	0	0	1	2	1	1	1	1	1	1	1	1	2	1	2	2	1	1	1	1	2	1	1	2	2	1	1	1	1	1	2	1
077	454	1	23	Hunan	Changsha	2	1	1	1	1	1	1	1	1	1	0	0	1	0	1	2	1	1	1	1	1	1	1	1	1	1	2	2	1	1	1	1	1	1	1	2	2	1	1	2	1	1	2	2
078	337	1	45	Hunan	Hangzhou	1	1	4	3	2	2	1	1	1	1	1	0	0	0	1	2	1	1	1	1	1	1	1	1	1	1	2	2	1	1	1	1	2	2	1	2	2	1	1	2	1	1	2	1
079	427	1	24	Hunan	Changsha	1	1	1	1	1	1	1	1	1	1	1	1	1	0	1	2	2	1	1	1	1	1	1	1	2	1	2	2	1	2	1	1	2	2	1	2	2	1	1	2	1	1	2	2
080	336	1	30	Hunan	Zhuzhou	2	1	3	1	2	1	1	1	1	0	0	0	0	0	1	2	1	2	1	1	1	1	1	1	2	1	2	2	1	1	1	1	1	3	1	2	2	1	2	1	2	1	2	1
081	423	1	31	Hunan	Taizhou	1	1	2	1	2	1	1	2	1	1	1	1	0	0	1	2	3	1	1	2	1	1	3	1	3	1	2	2	1	1	1	1	1	2	1	1	2	1	2	2	2	2	2	2
082	335	1	30	Hunan	Hangzhou	1	1	2	1	2	1	1	2	1	0	0	0	0	0	1	2	1	1	1	1	1	1	1	1	1	1	2	2	1	1	1	1	1	2	2	2	2	1	1	1	1	1	2	1
083	668	1	48	Hunan	Hangzhou	1	1	4	3	2	2	1	1	1	1	1	0	0	0	1	2	1	1	1	1	1	1	1	1	2	1	2	2	1	2	1	1	2	1	2	2	2	1	1	2	1	1	3	1
084	432	1	30	Hunan	Changsha	1	1	2	1	2	1	1	1	1	0	0	0	0	0	1	2	1	1	1	1	1	1	1	1	2	1	2	2	1	2	1	1	2	2	1	2	2	1	1	2	1	1	2	1
085	536	1	43	Hunan	Hangzhou	1	1	4	3	2	1	2	2	0	0	0	1	0	0	1	2	1	1	1	1	1	1	1	1	2	1	2	2	1	1	1	1	2	2	1	2	2	1	1	2	1	1	2	1
086	648	1	40	Hunan	Hangzhou	1	1	4	2	1	1	2	1	1	0	0	1	0	0	1	2	1	1	1	2	1	1	1	1	2	1	2	1	1	2	1	1	2	3	1	1	2	2	2	1	2	1	1	2
087	458	1	39	Hunan	Hangzhou	1	1	4	3	2	1	1	1	1	0	0	0	0	0	1	2	1	1	1	1	1	1	1	1	1	1	2	2	1	2	1	1	2	2	1	2	2	1	2	2	1	1	2	1
088	397	1	38	Hunan	Hangzhou	1	1	2	1	2	1	1	1	1	0	1	1	0	0	1	2	1	1	1	2	1	1	1	1	2	1	2	2	1	1	1	3	2	3	2	2	2	2	1	2	1	1	3	1
089	533	1	31	Hunan	Hangzhou	1	1	2	1	2	1	1	1	1	0	0	0	0	0	1	2	1	1	1	1	1	1	1	1	2	1	2	2	1	1	1	1	2	2	1	1	2	1	1	3	1	1	2	1
090	464	1	32	Hunan	Hangzhou	1	1	3	1	2	1	1	1	1	0	0	0	0	0	1	2	1	1	1	1	1	1	1	1	2	1	2	2	1	2	1	1	2	1	1	2	2	1	1	2	1	1	2	1
091	323	1	34	Hunan	Hangzhou	1	1	3	2	2	1	1	2	1	1	1	1	1	0	1	2	1	1	1	1	1	2	1	1	2	1	2	2	1	2	1	1	2	2	2	2	2	1	1	2	2	1	2	1
092	490	1	36	Hunan	Hangzhou	1	1	4	2	2	1	2	1	1	1	0	1	0	0	1	2	1	1	1	1	1	1	1	1	1	1	1	1	1	1	1	1	1	1	1	2	2	1	1	1	1	1	1	1
093	327	1	40	Hunan	Jishou	1	1	4	2	2	1	1	1	1	1	1	1	0	0	1	2	1	1	1	1	1	1	1	1	2	1	2	2	1	2	1	1	1	3	1	2	1	1	1	1	1	1	2	1
094	1251	1	23	Hunan	Jishou	1	1	1	1	1	1	2	1	1	0	1	1	0	0	1	2	1	1	1	2	1	1	1	1	2	1	2	2	1	3	1	1	2	1	1	2	2	1	1	2	1	1	2	2
095	705	1	34	Hunan	Jishou	2	1	3	1	2	1	1	2	0	0	0	0	0	1	1	2	1	1	1	1	1	1	1	1	1	1	1	1	1	1	1	1	1	3	2	2	2	1	1	1	1	1	1	1
096	434	1	31	Zhejiang	Changsha	1	1	3	2	2	1	1	1	1	0	1	0	0	0	1	2	1	1	1	1	1	1	1	1	1	1	1	1	1	1	1	1	1	2	1	2	1	1	1	1	1	1	2	1
097	387	1	30	Hunan	Hangzhou	2	1	3	1	2	1	1	2	0	0	0	1	0	0	2	2	1	1	1	1	1	1	1	1	2	1	2	1	1	1	1	1	1	2	1	2	2	1	2	1	1	1	2	3
098	353	1	35	Hunan	Changsha	2	1	3	2	2	1	1	2	0	0	1	0	0	0	2	2	1	1	1	1	1	1	1	1	2	1	2	2	1	1	1	1	2	3	1	2	2	1	1	3	1	1	3	1
099	319	1	34	Hunan	Xiangtan	2	1	3	2	2	1	1	2	0	0	0	1	1	0	2	2	3	1	1	1	1	2	3	1	1	1	1	1	1	1	1	1	1	3	2	2	2	2	2	2	2	2	2	1
100	293	1	35	Hunan	Yiyang	2	1	2	2	2	1	1	2	0	1	1	0	0	0	2	2	3	1	3	1	3	1	1	1	2	3	2	2	3	3	3	3	3	2	3	3	3	3	3	3	3	3	3	2
101	479	1	25	Zhejiang	Changsha	1	1	1	1	2	1	1	1	1	1	0	0	1	0	1	1	1	1	1	1	1	1	1	1	2	1	2	2	1	1	1	1	2	2	1	2	2	1	1	2	1	1	2	2
102	455	1	35	Hunan	Changsha	1	1	3	2	1	1	1	2	0	0	0	0	0	1	2	2	1	1	1	1	1	1	1	1	2	2	1	2	1	1	1	1	1	1	1	1	2	1	1	1	1	1	2	3
103	606	1	43	Zhejiang	Changsha	1	1	4	2	2	1	1	1	1	0	0	0	0	0	1	2	1	1	1	1	1	1	1	1	2	1	2	2	1	2	1	1	2	1	2	2	2	1	1	2	1	1	2	2
104	416	1	36	Hunan	Hangzhou	2	2	3	1	2	1	2	2	0	0	0	1	0	0	2	2	1	1	1	1	1	1	1	1	1	1	2	2	1	1	1	1	1	1	1	1	1	1	1	1	1	1	1	1
105	420	1	36	Zhejiang	Changsha	1	1	4	2	2	1	1	1	1	0	0	1	1	0	1	1	1	1	1	1	1	1	1	1	2	1	2	2	1	1	1	1	1	3	1	2	2	2	1	2	1	1	2	3
106	345	1	28	Zhejiang	Jishou	1	1	2	2	2	1	2	2	1	0	0	0	0	0	1	2	1	1	1	1	1	1	1	1	2	1	1	1	1	1	1	1	1	3	1	2	2	1	1	1	1	1	1	1
107	734	1	46	Zhejiang	Hangzhou	1	1	4	3	2	2	1	1	1	1	1	1	0	1	1	2	1	1	1	1	1	1	1	1	1	1	2	2	1	1	1	1	2	2	1	2	2	1	1	2	1	1	2	1
108	290	1	34	Hunan	Huaihua	2	1	3	2	2	1	1	2	1	0	0	0	0	0	2	2	1	1	1	1	1	1	1	1	1	1	1	1	1	1	1	1	1	3	1	2	2	1	1	2	1	1	2	1
109	250	1	25	Zhejiang	Changsha	1	2	1	1	3	1	3	2	1	0	1	1	1	0	2	2	1	1	1	1	1	1	1	1	2	1	2	2	1	1	1	1	2	2	1	2	2	1	1	2	1	1	2	2
110	177	1	22	Zhejiang	Jishou	1	1	1	1	3	1	1	1	1	1	1	1	1	0	1	1	1	1	1	1	1	1	1	1	2	1	2	2	1	1	1	1	2	2	1	2	2	1	1	2	1	1	2	1
111	438	1	31	Zhejiang	Changsha	1	1	2	1	2	1	1	1	1	0	0	0	0	0	1	2	1	1	1	1	2	1	1	1	1	2	1	1	1	1	1	1	1	2	1	1	1	1	1	1	1	1	1	2
112	526	1	43	Zhejiang	Jishou	1	1	4	3	2	2	1	1	1	1	0	0	0	0	1	2	1	1	1	1	1	1	1	1	2	1	2	2	1	2	1	1	2	3	1	2	2	1	1	2	1	1	2	1
113	329	1	38	Hunan	Hangzhou	2	1	3	2	2	1	1	2	0	0	0	1	0	0	2	2	1	1	1	1	1	1	1	1	2	1	2	2	1	1	1	1	1	1	1	2	1	1	1	2	1	1	2	2
114	523	1	35	Hunan	Changsha	2	1	3	1	2	1	1	2	1	0	0	1	0	1	2	2	1	1	1	1	1	1	1	1	2	1	2	2	1	1	1	1	1	2	1	2	1	2	1	2	1	1	1	2
115	305	1	24	Zhejiang	Taizhou	1	2	1	1	2	1	1	2	1	1	1	1	0	0	2	2	1	1	1	1	1	1	1	1	2	1	2	2	1	1	1	1	2	2	1	2	2	1	1	3	1	1	2	1
116	331	1	23	Zhejiang	Jishou	1	2	1	1	3	1	2	2	0	0	0	1	1	0	2	2	1	1	1	2	1	1	3	1	1	1	2	1	1	3	1	3	2	3	1	2	2	2	3	2	1	1	1	1
117	436	1	24	Hunan	Taizhou	2	2	3	1	1	1	1	1	1	1	1	1	1	0	1	2	1	1	1	1	1	1	1	1	1	1	1	1	1	1	1	1	1	2	1	1	1	1	1	1	1	1	1	1
118	315	1	27	Zhejiang	Hangzhou	1	2	1	1	2	1	1	1	1	1	0	1	1	0	1	2	1	1	1	1	1	1	1	1	1	1	2	2	1	1	1	1	2	2	1	2	2	1	1	2	1	1	2	2
119	789	1	24	Zhejiang	Changsha	1	2	1	1	2	1	1	1	1	1	1	1	1	0	1	2	1	1	1	2	1	1	1	1	2	1	2	2	1	2	1	1	2	2	1	2	2	3	1	2	3	1	3	1
120	221	1	29	Hunan	Zhuzhou	1	1	2	1	2	1	3	1	1	1	1	1	1	0	1	2	1	1	1	1	1	1	1	1	1	1	1	1	1	1	1	1	1	1	2	2	1	1	1	1	1	1	1	1
121	363	1	33	Zhejiang	Taizhou	1	2	3	1	2	1	3	1	1	1	0	0	0	0	1	2	1	1	1	1	1	1	3	1	2	1	2	2	1	1	1	1	2	2	1	2	2	1	1	2	1	1	2	2
122	368	1	37	Hunan	Changsha	1	1	3	2	3	1	1	1	1	1	1	0	0	0	1	2	1	1	1	1	1	1	1	1	1	1	2	2	1	2	1	1	2	1	1	2	2	1	1	2	1	1	2	1
123	522	1	33	Zhejiang	Changsha	1	1	3	1	2	1	1	2	1	0	0	0	0	0	1	1	1	2	1	2	1	1	1	1	2	1	2	2	1	3	1	1	1	1	1	2	2	1	2	2	1	1	2	2
124	414	1	33	Zhejiang	Changsha	1	1	2	1	2	1	1	1	1	1	1	1	1	0	1	1	1	1	1	2	1	1	1	1	2	1	2	2	1	2	1	1	2	1	1	2	2	1	1	2	1	1	2	1
125	379	1	31	Hunan	Changsha	1	1	1	1	3	1	1	1	1	0	1	1	0	0	1	2	1	1	1	2	1	1	1	1	2	1	2	2	1	2	1	1	2	1	1	2	2	1	1	2	1	1	2	1
126	415	1	43	Zhejiang	Changsha	1	1	4	2	2	1	1	2	0	0	1	0	0	0	1	2	1	1	1	1	1	1	1	1	2	1	2	2	1	1	1	1	1	1	1	2	2	1	1	2	1	1	2	1
127	363	1	27	Zhejiang	Taizhou	1	1	1	1	2	1	1	2	1	0	1	1	0	0	2	2	1	1	1	1	1	1	1	1	2	1	2	2	1	1	1	1	1	2	2	2	2	1	1	2	1	1	1	1
128	722	1	35	Hunan	Changsha	1	1	3	2	1	1	1	1	1	0	0	0	0	0	1	1	1	1	1	2	2	1	1	1	1	1	2	2	1	2	1	1	2	1	1	2	2	1	1	2	1	3	2	5
129	1016	1	35	Hunan	Taizhou	3	2	3	1	1	1	1	2	0	0	0	1	0	0	2	2	3	1	3	3	3	1	1	1	3	3	3	3	3	1	1	3	1	1	3	3	3	3	3	3	1	1	2	2
130	204	1	37	Hunan	Changsha	1	1	3	2	2	1	1	1	1	0	0	0	0	0	1	2	1	1	1	1	1	1	1	1	2	1	2	2	1	1	1	1	1	1	1	2	2	2	1	2	2	1	2	1
131	212	1	30	Hunan	Yueyang	1	1	3	2	2	1	2	1	1	0	0	0	0	0	1	2	1	1	1	1	1	1	1	1	2	1	2	2	1	1	1	1	1	1	1	2	2	1	1	2	1	1	2	4
132	392	1	35	Hunan	Hangzhou	2	1	3	2	2	1	2	2	0	0	0	1	0	0	2	2	3	1	1	1	1	1	1	1	2	1	1	1	1	1	1	3	3	3	1	2	1	1	1	3	3	1	1	1
133	796	1	28	Zhejiang	Yueyang	1	1	1	1	2	1	1	1	1	0	0	0	0	0	2	2	1	1	1	1	3	2	1	1	2	1	2	2	1	1	1	1	2	1	2	2	2	2	2	2	2	1	1	1
134	240	1	34	Hunan	Changsha	1	1	3	1	2	1	2	1	1	0	0	0	0	0	1	1	1	1	1	1	1	1	1	1	1	1	1	1	1	1	1	1	1	1	1	1	1	1	1	1	1	1	1	1
135	314	1	33	Hunan	Changsha	2	1	3	1	2	1	1	1	1	1	0	0	0	0	1	2	1	1	1	1	1	1	1	1	2	2	2	2	1	1	1	1	2	3	1	2	2	1	1	1	1	1	2	1
136	359	1	35	Hunan	Yueyang	1	1	1	1	1	1	1	1	1	1	1	1	1	0	1	2	1	1	1	1	1	1	1	1	1	1	1	2	1	1	1	1	1	1	1	2	2	1	1	2	1	1	2	3
137	731	1	35	Hunan	Changsha	1	1	3	2	2	1	2	2	1	0	0	0	0	0	2	2	1	1	1	1	2	2	1	1	2	1	2	2	3	2	2	2	3	1	2	1	1	2	2	2	2	1	2	1
138	574	1	35	Zhejiang	Changsha	2	1	3	1	1	1	2	2	0	0	0	1	0	0	2	2	3	3	3	3	3	3	3	1	3	3	3	3	3	3	3	3	3	2	3	3	3	3	3	3	3	3	3	3
139	394	1	25	Zhejiang	Changsha	1	1	1	1	2	1	1	2	1	0	0	0	0	0	1	2	1	2	1	1	2	1	1	1	2	1	2	2	1	2	1	1	2	1	1	2	1	2	2	2	1	1	2	1
140	501	1	22	Zhejiang	Yueyang	1	2	1	1	2	1	1	1	1	0	0	0	1	0	1	2	1	1	1	1	1	1	1	1	2	1	2	2	1	2	1	1	2	2	1	2	2	1	1	2	1	1	2	1
141	296	1	35	Hunan	Xiangtan	3	1	1	1	1	1	1	1	0	0	0	1	0	0	2	2	3	3	3	1	3	3	3	1	3	1	2	3	3	3	3	3	3	1	1	2	2	3	3	3	1	1	1	2
142	266	1	33	Zhejiang	Changsha	1	2	3	1	2	1	1	2	1	0	1	0	0	0	2	2	1	1	1	1	1	1	1	1	2	1	1	2	1	1	1	1	1	2	1	2	1	1	1	1	1	1	1	1
143	414	1	37	Zhejiang	Changsha	1	2	3	1	2	1	1	1	1	0	0	0	0	0	1	2	1	1	1	1	1	1	1	1	1	1	1	1	1	1	1	1	1	3	1	2	2	1	1	2	1	1	2	2
144	630	1	54	Zhejiang	Changsha	1	2	4	3	2	2	1	1	1	1	0	1	0	1	1	2	1	1	1	3	1	1	1	1	2	1	2	2	1	2	1	1	1	2	1	2	2	1	1	2	1	1	2	2
145	298	1	41	Zhejiang	Changsha	1	2	4	1	2	1	1	1	1	0	0	1	0	0	2	2	1	1	1	1	1	1	1	1	2	1	2	2	1	1	1	1	2	1	1	2	1	1	1	1	1	1	1	2
146	396	1	35	Zhejiang	Changsha	1	2	3	1	2	1	1	2	1	0	0	1	0	0	1	2	1	1	1	1	1	1	1	1	1	1	2	2	1	1	1	3	2	2	1	2	2	3	1	3	1	1	3	2
147	806	1	34	Hunan	Shaoxing	1	1	3	2	2	1	1	2	0	0	1	1	1	0	1	1	1	1	1	2	1	2	1	1	2	1	2	2	1	2	1	1	2	2	1	2	2	1	1	2	1	1	2	2
148	340	1	31	Hunan	Shaoxing	2	1	2	2	2	1	1	1	1	0	1	1	0	0	1	2	1	1	1	1	1	1	1	1	2	1	2	2	1	2	1	1	2	2	1	1	2	1	1	2	1	1	2	1
149	310	1	31	Hunan	Changsha	2	1	2	2	1	1	1	1	1	0	0	0	0	0	1	2	1	1	1	2	1	1	1	1	2	1	2	2	1	2	1	1	1	2	1	2	1	1	1	2	1	1	2	4
150	515	1	29	Hunan	Zhuzhou	1	1	2	1	1	1	1	1	1	0	1	0	0	0	1	2	1	1	1	1	1	1	1	1	1	1	1	1	1	1	1	2	2	1	1	2	2	1	1	2	2	1	2	1
151	398	1	34	Zhejiang	Yueyang	1	1	3	2	2	1	1	1	1	0	1	1	0	0	1	1	1	1	1	1	1	1	1	1	2	1	1	2	1	2	1	1	2	1	1	2	2	1	1	1	1	1	1	1
152	440	1	34	Hunan	Changsha	1	1	3	2	2	1	1	1	1	1	0	0	0	0	1	1	1	1	1	1	1	1	1	1	2	1	2	2	2	1	1	1	1	1	1	2	1	1	1	1	1	1	1	1
153	368	1	27	Hunan	Changsha	3	1	1	1	1	1	1	2	0	0	1	0	0	0	2	2	1	1	1	1	1	1	3	1	2	1	2	2	1	1	1	1	1	1	1	2	2	1	1	1	2	1	2	4
154	500	1	30	Zhejiang	Changsha	1	1	2	1	2	1	1	2	0	0	1	1	0	0	1	2	1	1	1	2	1	1	1	1	2	1	2	2	1	1	1	1	1	2	1	2	2	1	1	2	1	1	2	1
155	765	1	33	Hunan	Changsha	2	1	3	2	2	1	1	2	0	0	0	0	0	1	2	2	1	1	1	1	1	1	1	1	2	1	1	1	1	1	1	1	2	3	2	2	1	2	2	2	1	2	1	2
156	303	1	27	Zhejiang	Hangzhou	1	1	1	1	2	1	1	1	1	0	1	0	1	0	1	2	1	1	1	1	1	1	1	1	2	1	2	2	1	1	1	1	1	3	1	2	2	1	1	2	1	1	2	1
157	504	1	30	Zhejiang	Wenzhou	1	1	2	1	2	1	1	1	1	0	0	0	0	0	1	2	1	1	1	1	1	1	1	1	2	1	2	2	1	1	1	1	2	2	1	2	2	1	1	2	1	1	2	1
158	317	1	35	Hunan	Changsha	3	1	3	2	2	1	1	1	1	1	1	0	0	0	1	1	1	1	1	1	1	1	1	1	2	2	2	2	1	1	1	1	1	1	2	1	1	2	2	2	1	1	1	3
159	228	1	35	Zhejiang	Zhuzhou	1	1	3	1	2	1	1	1	1	1	0	1	0	0	1	2	1	1	1	1	1	1	1	1	1	1	1	1	1	1	1	1	1	1	1	2	2	1	1	2	1	1	2	1
160	481	1	30	Zhejiang	Shaoxing	1	1	2	1	2	1	1	1	1	0	0	0	0	1	1	2	1	1	1	1	1	1	1	1	2	1	2	2	1	2	1	1	2	2	1	2	2	1	1	2	1	1	2	2
161	688	1	40	Zhejiang	Changsha	1	1	4	2	2	1	1	1	1	0	1	0	0	0	1	2	1	1	1	3	1	1	3	1	3	1	2	2	1	3	1	1	1	2	1	2	2	1	1	3	1	1	2	2
162	204	1	31	Zhejiang	Changsha	1	1	2	1	2	1	2	1	1	0	0	1	0	0	1	2	1	1	1	1	1	1	1	1	2	1	1	1	1	1	1	1	1	1	1	2	2	1	1	1	1	1	2	1
163	402	1	22	Zhejiang	Changsha	1	1	1	1	2	1	1	1	1	0	1	1	1	0	1	2	1	1	1	2	1	1	1	1	2	1	2	2	1	1	1	1	2	1	1	3	1	1	1	1	3	1	2	1
164	996	1	43	Zhejiang	Changsha	1	1	4	2	2	1	1	1	1	1	0	1	0	0	1	2	1	1	1	1	1	1	1	1	1	1	2	2	1	1	1	1	1	3	1	2	2	1	1	2	1	1	2	2
165	544	1	31	Hunan	Shaoxing	1	1	3	2	2	1	1	2	1	0	0	0	0	0	1	2	3	1	1	1	1	1	1	1	2	1	2	2	1	1	1	1	2	3	1	1	2	1	1	3	1	1	2	1
166	358	1	27	Hunan	Changsha	1	1	1	1	2	1	1	1	1	0	0	1	0	0	1	2	1	1	1	1	1	1	1	1	2	1	2	2	1	1	1	1	1	2	1	2	2	1	1	2	1	1	1	1
167	569	1	33	Hunan	Shaoxing	1	1	3	2	2	1	1	2	1	0	0	0	0	0	1	2	1	1	1	1	1	1	1	1	2	1	2	2	1	1	1	1	2	2	1	2	2	1	1	2	1	1	2	1
168	585	1	28	Hunan	Shaoxing	1	1	2	1	2	1	1	2	1	0	0	0	0	0	1	2	1	1	1	1	1	1	1	1	2	1	2	2	1	1	1	1	2	2	1	2	2	1	1	3	1	1	1	1
169	245	1	23	Hunan	Changsha	1	1	3	2	2	1	1	1	1	0	0	0	0	0	1	1	1	1	1	1	1	1	1	1	2	2	2	2	2	2	1	1	1	1	1	2	2	1	1	1	1	1	2	1
170	704	1	27	Hunan	Wenzhou	1	1	2	1	1	1	1	2	1	1	0	0	0	0	1	2	1	1	1	1	1	1	1	1	2	1	2	2	1	1	1	1	2	3	1	1	2	1	1	3	1	1	2	1
171	404	1	34	Hunan	Changsha	1	1	2	2	2	1	1	1	1	0	0	0	0	0	2	2	1	1	1	1	1	1	1	1	2	1	2	2	1	1	1	1	2	2	1	2	2	2	1	2	3	1	2	1
172	485	1	40	Hunan	Changsha	1	1	4	2	2	2	1	1	0	1	0	1	0	0	1	1	1	1	1	1	1	1	1	1	2	1	1	1	3	3	3	1	2	2	2	2	2	3	3	3	3	1	3	2
173	475	1	36	Hunan	Changsha	1	1	4	2	2	1	2	1	1	0	0	0	0	0	1	1	1	1	1	2	1	1	1	1	2	1	2	3	1	3	1	1	1	1	3	2	2	1	1	3	3	1	3	2
174	279	1	35	Hunan	Huaihua	1	1	2	2	2	1	1	1	1	0	1	1	0	0	1	2	1	1	1	1	1	1	1	1	2	1	2	2	1	1	1	1	2	3	1	2	1	1	1	2	1	1	2	1
175	263	1	39	Zhejiang	Wenzhou	1	1	4	1	2	1	1	1	1	0	0	0	0	0	1	1	1	1	1	1	1	1	1	1	2	1	3	1	1	1	1	1	1	3	1	1	1	1	1	1	1	1	1	2
176	336	1	29	Hunan	Taizhou	1	1	2	1	2	1	1	1	1	0	0	0	0	0	1	2	1	1	1	1	1	1	1	1	1	1	1	1	1	1	1	1	1	3	1	1	1	1	1	1	1	1	1	1
177	402	1	27	Hunan	Hangzhou	1	1	1	1	2	1	1	1	1	0	1	1	0	0	1	2	1	1	1	3	1	2	1	1	2	1	2	2	1	1	1	2	2	3	1	2	2	1	1	2	1	1	2	1
178	454	1	52	Zhejiang	Hangzhou	1	1	4	3	2	1	2	2	0	0	1	0	0	0	2	2	1	1	1	1	1	1	1	1	2	1	2	2	1	1	1	1	2	3	1	2	2	1	1	2	1	1	2	2
179	410	1	48	Zhejiang	Taizhou	1	1	4	2	2	1	1	1	1	0	0	0	0	0	1	2	1	3	1	3	1	1	3	1	2	1	1	2	1	2	1	1	1	3	1	2	2	1	1	1	1	1	1	1
180	511	1	46	Zhejiang	Hangzhou	1	1	4	2	2	1	2	1	1	0	0	0	0	0	2	2	1	1	1	3	1	1	1	1	2	1	2	2	1	2	1	1	1	3	1	2	2	1	1	2	1	1	2	2
181	317	1	35	Zhejiang	Changsha	1	1	3	1	2	1	1	1	1	0	0	0	0	0	1	2	1	1	2	1	1	1	1	1	2	1	2	2	1	2	1	1	2	3	1	2	2	2	2	1	1	1	2	1
182	520	1	30	Hunan	Wenzhou	1	1	2	1	2	1	1	1	1	0	0	0	0	0	1	2	1	1	1	1	1	1	1	1	2	1	2	2	1	2	1	1	2	1	1	2	2	1	1	2	1	1	2	1
183	304	1	26	Hunan	Hangzhou	2	1	1	1	2	1	1	1	1	0	1	0	1	0	1	2	1	1	1	2	1	1	1	1	2	1	2	1	1	1	1	1	1	1	1	2	2	1	1	2	1	1	2	1
184	370	1	45	Zhejiang	Xiangtan	1	1	4	1	1	1	1	1	1	1	1	1	1	0	1	1	1	1	1	1	1	1	1	1	1	1	1	1	1	1	1	1	1	2	1	1	1	1	1	1	1	1	1	1
185	733	1	41	Zhejiang	Zhuzhou	1	1	4	2	2	2	1	2	0	0	1	0	0	0	2	2	1	1	1	1	1	1	1	1	2	1	2	2	1	1	1	1	2	2	1	2	2	2	1	1	1	1	1	1
186	510	1	54	Hunan	Wenzhou	1	1	4	3	2	2	1	1	1	1	0	0	0	0	1	2	1	1	1	3	1	1	1	1	3	1	2	3	1	3	1	1	2	2	1	1	2	1	1	2	1	1	2	1
187	522	1	25	Hunan	Wenzhou	1	1	1	1	2	1	1	2	1	0	0	0	1	0	1	2	1	1	1	1	1	2	1	1	2	1	2	1	1	3	1	1	2	3	1	2	2	1	1	2	3	1	2	2
188	299	1	45	Zhejiang	Wenzhou	1	1	4	2	2	1	1	1	1	1	1	1	1	0	1	2	1	1	1	1	1	1	1	1	2	1	2	2	1	1	1	1	1	1	1	2	2	1	1	2	1	1	2	1
189	218	1	26	Zhejiang	Wenzhou	1	2	1	1	3	1	3	2	1	0	0	1	1	0	2	2	1	1	1	3	1	1	3	1	2	1	2	2	1	1	1	1	2	3	1	2	2	1	1	2	1	1	2	2
190	426	1	34	Zhejiang	Xiangtan	1	1	2	1	2	1	1	1	1	0	0	0	0	0	1	1	1	1	1	1	1	1	1	1	1	1	1	1	1	1	1	1	1	1	1	1	1	1	1	1	1	1	1	1
191	685	1	52	Zhejiang	Xiangtan	2	1	4	3	1	2	1	1	1	0	1	0	0	0	1	2	1	1	1	1	1	1	1	1	2	1	2	2	1	1	1	1	1	3	1	2	2	1	1	2	1	1	2	1
192	297	1	34	Zhejiang	Xiangtan	1	1	2	2	2	1	1	2	1	0	0	0	0	1	1	2	1	1	1	1	1	1	1	1	2	1	1	1	1	1	1	1	1	1	1	1	1	1	1	1	1	1	1	1
193	298	1	32	Zhejiang	Hangzhou	1	1	2	1	2	1	1	2	0	0	1	0	0	0	2	2	1	1	1	1	1	1	1	1	2	1	2	1	1	1	2	1	1	1	1	2	2	2	2	1	1	1	2	2
194	325	1	34	Zhejiang	Wenzhou	1	1	3	1	2	1	1	1	1	0	0	0	0	0	1	2	3	3	2	3	3	3	3	1	3	2	1	3	2	1	1	1	2	2	2	2	1	2	1	2	2	1	2	1
195	214	1	30	Hunan	Wenzhou	1	1	2	1	2	1	3	2	0	0	1	1	0	0	1	1	1	1	1	1	1	1	1	1	2	1	2	2	1	1	1	1	2	1	1	1	1	1	1	2	1	1	2	1
196	187	1	30	Hunan	Wenzhou	1	1	4	2	2	2	1	1	1	1	1	1	1	0	1	2	1	1	1	2	1	1	1	1	2	1	2	2	1	2	1	1	2	2	1	2	2	1	1	2	1	1	2	1
197	479	1	29	Zhejiang	Wenzhou	1	1	2	2	2	1	3	1	1	1	1	1	1	0	1	2	1	1	1	1	1	1	1	1	2	1	2	2	1	1	1	2	2	2	1	2	2	1	1	1	1	1	1	1
198	273	1	35	Hunan	Wenzhou	1	1	4	2	2	1	2	2	1	0	0	0	0	0	1	1	1	1	1	1	3	1	1	1	1	1	2	1	1	1	1	1	2	1	2	2	1	1	1	1	1	2	2	2
199	281	1	36	Zhejiang	Wenzhou	1	1	3	1	2	1	1	1	1	1	0	0	0	0	1	2	1	1	1	1	1	1	1	1	2	1	2	2	1	3	1	1	2	2	1	2	2	1	3	1	1	1	1	1
200	273	1	26	Zhejiang	Wenzhou	1	2	2	1	2	1	1	2	0	0	1	1	0	0	2	2	1	1	1	2	1	1	1	1	2	1	2	2	1	1	1	1	2	2	3	2	2	1	1	3	1	1	2	2
201	788	1	33	Hunan	Hangzhou	1	1	2	2	2	1	1	1	1	0	0	0	0	0	1	2	1	1	1	3	1	1	1	1	2	1	2	2	1	1	1	1	2	3	1	2	1	1	1	2	1	1	1	3
202	377	1	37	Zhejiang	Hangzhou	1	1	3	2	2	1	2	1	1	0	1	0	0	0	2	2	2	1	1	2	1	1	1	1	2	1	1	1	1	1	1	1	2	2	1	2	2	1	1	2	1	1	2	2
203	348	1	40	Zhejiang	Hangzhou	1	1	4	2	2	1	2	1	1	1	1	1	0	0	1	2	1	1	1	1	1	1	1	1	2	1	2	2	1	1	1	1	2	1	1	2	2	2	1	2	1	1	2	2
204	407	1	29	Zhejiang	Hangzhou	1	1	2	1	2	1	1	2	1	1	1	0	0	0	1	2	1	1	1	1	1	1	1	1	1	1	2	2	1	1	1	1	1	2	1	2	1	1	1	1	1	1	1	1
205	484	1	22	Hunan	Wenzhou	2	1	1	1	1	1	3	2	1	0	1	1	0	0	1	2	1	1	1	1	1	1	1	1	2	1	2	2	1	1	1	1	2	2	1	2	2	1	1	2	1	1	2	2
206	169	1	25	Zhejiang	Hangzhou	1	2	1	1	2	1	1	1	1	1	1	1	1	0	1	2	1	1	1	2	1	2	1	1	2	1	2	2	1	1	1	1	2	3	1	1	2	1	1	1	1	1	2	1
207	320	1	32	Zhejiang	Hangzhou	1	2	3	2	2	1	1	1	1	0	0	0	0	0	1	2	1	1	1	3	1	1	1	1	1	1	2	2	1	3	1	1	2	2	1	2	2	1	1	2	1	1	2	1
208	363	1	22	Zhejiang	Hangzhou	1	2	1	1	1	1	1	1	1	0	1	0	1	0	1	1	1	1	1	1	1	1	1	1	2	1	2	2	1	1	1	1	2	2	1	2	2	1	1	2	1	1	2	1
209	334	1	41	Zhejiang	Zhuzhou	1	2	4	2	2	2	1	1	1	0	0	0	0	0	1	2	1	1	1	2	1	2	1	1	1	1	2	2	1	1	1	2	2	1	1	2	2	1	1	2	1	1	2	1
210	578	1	23	Zhejiang	Zhuzhou	1	2	1	1	1	1	1	1	1	0	1	1	0	0	1	2	3	1	1	2	1	1	2	1	3	1	2	2	1	2	1	1	2	2	1	1	2	1	1	2	1	1	1	1
211	278	1	33	Zhejiang	Zhuzhou	1	2	2	1	2	2	3	2	0	0	1	1	0	0	2	2	1	1	1	2	1	2	1	1	2	1	2	2	1	1	1	1	2	1	1	2	2	2	1	3	1	1	2	1
212	1026	1	44	Zhejiang	Zhuzhou	1	1	4	2	2	1	2	1	1	0	0	0	0	0	1	2	1	1	1	2	1	1	3	1	2	1	2	3	1	3	1	1	2	1	1	2	1	1	1	2	1	1	2	3
213	673	1	46	Hunan	Shaoxing	1	1	4	3	2	2	1	1	1	1	1	0	0	0	1	1	1	1	1	1	1	1	1	1	2	1	2	2	1	2	1	1	2	3	1	2	2	1	1	2	1	1	2	5
214	292	1	25	Hunan	Zhuzhou	1	1	1	1	1	1	1	2	1	0	0	1	0	0	1	2	1	3	3	3	3	1	3	1	3	2	3	3	3	3	3	3	3	3	2	2	2	2	3	3	3	3	3	1
215	613	1	36	Hunan	Zhuzhou	1	1	3	2	2	1	1	1	1	0	1	0	0	0	1	2	1	1	1	1	2	1	1	1	2	1	2	2	1	2	1	3	2	1	1	2	2	2	1	1	1	1	2	2
216	432	1	29	Hunan	Zhuzhou	1	1	2	1	2	1	1	1	1	0	0	0	0	0	1	2	1	1	1	1	1	1	1	1	2	1	2	2	1	1	1	3	2	2	3	2	2	3	3	3	1	1	3	1
217	833	1	25	Hunan	Hangzhou	1	1	1	1	2	1	1	1	1	0	1	1	1	0	1	2	1	1	1	1	1	1	1	1	2	1	2	2	1	2	1	1	2	1	1	2	2	1	1	2	1	1	2	2
218	285	1	25	Zhejiang	Zhuzhou	1	2	1	1	1	1	1	2	1	0	1	0	1	0	1	1	1	2	1	3	3	1	3	1	2	1	2	3	1	1	1	1	2	2	1	3	2	1	1	2	2	1	2	3
219	357	1	30	Hunan	Hangzhou	1	1	2	2	2	1	1	1	1	0	1	1	1	0	1	2	1	1	1	1	1	1	1	1	2	1	2	2	1	1	1	1	2	3	2	2	1	1	1	2	1	1	2	1
220	333	1	29	Hunan	Zhuzhou	1	1	2	2	2	1	1	2	1	1	1	1	1	0	1	2	1	1	1	1	1	1	1	1	2	1	2	2	1	1	1	1	1	3	1	2	2	1	1	2	1	1	2	1
221	438	1	32	Hunan	Zhuzhou	1	1	2	1	1	1	1	2	1	0	1	1	0	0	2	2	3	1	1	1	1	2	1	1	2	1	1	2	1	2	3	3	2	3	1	3	2	2	3	3	1	1	2	2
222	470	1	28	Zhejiang	Zhuzhou	1	2	1	1	2	1	1	1	1	0	0	0	0	0	1	2	1	1	1	1	1	1	1	1	2	1	2	2	1	2	1	1	1	1	1	2	2	1	1	2	1	1	2	2
223	387	1	30	Zhejiang	Zhuzhou	1	2	2	1	1	1	1	1	1	0	1	1	0	0	1	2	1	1	1	1	1	1	1	1	2	1	2	2	1	1	1	1	1	3	1	2	2	1	1	3	1	1	2	2
224	476	1	36	Hunan	Zhuzhou	1	1	3	2	3	2	1	1	1	1	1	0	0	0	1	2	1	1	1	1	1	1	1	1	2	1	2	2	1	1	1	1	2	1	1	2	2	1	2	2	1	1	2	1
225	397	1	25	Zhejiang	Zhuzhou	1	2	1	1	2	1	1	1	1	0	0	0	1	0	1	2	1	1	1	1	1	1	1	1	2	1	2	2	1	2	1	1	2	1	2	2	2	2	1	2	2	1	2	2
226	519	1	37	Hunan	Zhuzhou	1	1	3	2	2	1	1	1	1	1	0	1	0	0	1	1	1	1	1	1	1	1	1	1	2	1	2	1	1	1	1	1	2	2	1	2	2	2	1	2	1	1	2	1
227	185	1	50	Hunan	Wenzhou	1	1	4	3	2	1	1	1	1	0	0	1	0	0	1	1	1	1	1	1	1	1	1	1	2	1	2	2	1	1	1	1	1	3	1	2	2	1	1	2	1	1	2	1
228	430	1	27	Zhejiang	Wenzhou	1	2	1	1	2	1	1	1	1	0	0	0	0	0	1	2	1	1	1	1	1	1	1	1	2	1	2	2	1	1	1	1	1	3	1	2	2	1	1	3	3	1	1	1
229	293	1	31	Hunan	Wenzhou	1	1	3	2	2	1	1	1	1	1	1	1	1	0	1	2	1	1	1	3	1	1	1	1	2	1	2	3	3	3	1	3	2	3	1	2	2	1	1	2	1	3	2	2
230	298	1	28	Hunan	Hangzhou	1	1	1	1	2	1	1	1	1	0	0	0	0	0	1	2	1	1	1	2	1	1	1	1	2	1	2	2	1	3	1	1	2	1	1	2	2	1	1	2	1	1	2	2
231	254	1	20	Hunan	Hangzhou	1	1	2	2	2	1	1	1	1	0	0	1	0	0	1	1	1	1	1	1	1	1	1	1	2	1	2	2	1	1	1	1	2	3	1	1	2	2	1	1	2	1	1	2
232	288	1	23	Hunan	Hangzhou	1	1	1	1	2	1	1	2	0	0	1	0	1	0	1	2	1	1	1	3	1	1	1	1	2	1	2	2	1	2	1	1	2	1	1	2	2	1	1	2	1	1	2	1
233	297	1	26	Hunan	Hangzhou	1	1	2	2	2	1	1	1	1	1	0	0	0	0	1	1	1	1	1	1	1	1	1	1	1	1	1	1	1	1	1	1	1	2	1	1	1	1	1	1	1	1	1	1
234	332	1	48	Hunan	Hangzhou	1	1	4	3	2	2	1	1	1	0	0	1	0	0	1	2	1	1	1	1	1	1	1	1	2	1	2	2	1	3	1	1	1	1	1	2	2	1	1	1	1	1	2	2
235	506	1	28	Hunan	Wenzhou	1	1	1	1	2	1	1	1	1	0	0	0	0	0	1	2	1	1	1	1	1	1	1	1	2	1	2	2	1	1	1	1	2	2	1	1	1	1	1	2	1	1	3	1
236	500	1	33	Hunan	Hangzhou	1	1	2	2	3	2	1	1	1	0	0	1	0	0	1	1	1	1	1	1	1	1	1	1	2	1	2	2	1	1	1	1	2	3	1	2	2	1	1	2	1	1	2	1
237	279	1	32	Hunan	Hangzhou	1	1	2	1	2	1	1	1	1	1	1	1	1	1	2	2	1	1	1	1	1	1	1	1	1	1	1	1	1	1	1	1	1	2	1	1	1	1	1	1	1	1	1	2
238	544	1	31	Hunan	Shaoxing	1	1	2	2	2	1	1	1	1	1	1	0	0	0	1	2	1	1	1	1	1	1	1	1	2	1	2	2	1	1	1	1	2	1	1	2	2	1	1	2	1	1	2	1
239	410	1	26	Zhejiang	Hangzhou	1	2	1	1	2	1	1	1	1	0	0	0	1	0	1	2	1	1	3	2	1	1	1	1	2	1	1	2	1	3	1	1	2	2	3	2	2	1	1	3	3	1	2	2
240	368	1	31	Hunan	Wenzhou	1	1	2	1	2	1	1	1	1	0	0	0	0	0	1	2	1	1	1	1	1	1	1	1	2	1	2	2	1	1	1	2	2	1	1	2	1	1	1	2	1	1	2	1
241	647	1	31	Hunan	Wenzhou	1	1	2	1	2	1	1	1	1	0	1	1	0	0	1	2	3	1	1	1	1	3	3	1	3	1	1	1	1	1	1	3	1	3	3	2	2	3	3	2	3	3	3	2
242	280	1	30	Hunan	Ningbo	1	1	2	2	2	1	1	1	1	1	1	1	0	0	1	1	1	1	1	1	1	1	1	1	2	1	2	2	1	2	1	1	2	3	1	2	2	1	1	2	1	1	2	1
243	432	1	33	Hunan	Ningbo	1	1	3	2	2	1	1	2	1	0	0	0	0	0	2	2	1	1	1	1	1	1	1	1	2	1	2	2	1	1	1	1	1	2	1	2	2	1	1	2	1	1	2	1
244	439	1	27	Hunan	Ningbo	1	1	2	1	2	1	1	1	1	0	0	0	0	0	1	2	1	1	1	2	1	1	1	1	2	1	2	2	1	2	3	1	2	3	1	2	2	1	1	2	1	1	2	1
245	818	1	25	Zhejiang	Ningbo	1	2	1	1	1	1	1	1	1	0	0	0	0	0	1	2	1	1	1	1	1	1	1	1	2	1	2	2	1	1	1	1	2	3	1	2	2	2	1	2	1	1	2	1
246	223	1	24	Zhejiang	Ningbo	1	2	1	1	1	1	1	2	1	0	0	0	0	0	1	2	3	1	1	1	1	3	1	1	2	1	2	2	1	1	1	1	1	2	1	2	2	2	1	2	2	1	2	2
247	580	1	23	Hunan	Ningbo	1	1	1	1	1	1	1	1	1	1	1	1	0	0	1	2	1	1	1	1	1	1	1	1	2	1	2	2	1	1	1	1	2	2	1	2	2	1	1	2	1	1	2	3
248	296	1	25	Hunan	Ningbo	1	1	1	1	2	1	1	1	1	0	0	0	0	0	1	1	1	1	1	1	1	1	1	1	2	1	2	2	1	2	1	1	2	2	1	2	2	1	1	3	1	1	2	3
249	175	1	31	Hunan	Ningbo	1	1	2	1	2	1	1	1	1	0	0	0	0	0	2	2	1	1	1	1	1	1	1	1	2	1	1	1	1	1	1	1	1	2	1	1	1	1	1	1	1	1	1	2
250	495	1	35	Hunan	Ningbo	1	1	3	2	2	1	1	1	1	0	1	1	0	0	1	1	1	1	1	1	1	1	1	1	2	1	2	2	1	1	1	1	2	2	2	2	2	1	1	1	1	1	2	2
251	343	1	30	Hunan	Wenzhou	1	1	2	1	2	1	1	1	1	0	0	1	0	1	1	2	3	1	1	1	1	1	1	1	3	1	2	3	1	1	1	1	2	3	1	2	2	1	1	3	1	1	2	2
252	327	1	31	Hunan	Wenzhou	1	1	2	2	2	1	1	2	1	0	1	0	1	0	1	2	1	1	1	1	1	1	1	1	2	1	2	2	1	2	1	1	2	2	2	2	2	2	1	2	2	1	2	1
253	219	1	28	Zhejiang	Changsha	1	1	2	1	2	1	1	2	1	0	0	0	1	0	2	2	1	1	1	1	3	3	3	1	3	3	3	3	3	3	3	3	3	1	3	3	3	3	1	2	3	3	1	2
254	895	1	24	Zhejiang	Changsha	1	2	1	1	2	1	1	2	1	0	1	1	1	0	1	2	1	1	1	3	1	1	2	1	1	1	1	1	1	1	1	2	1	1	1	2	1	2	1	2	1	1	1	1
255	216	1	30	Hunan	Changsha	1	1	2	2	2	1	1	2	1	0	1	1	0	0	1	2	1	1	1	1	1	1	1	1	1	1	1	1	1	1	1	1	1	1	1	1	1	1	1	1	1	1	1	2
256	675	1	30	Hunan	Changsha	1	1	2	1	2	1	1	2	1	1	1	1	1	0	1	2	1	1	1	2	1	1	1	1	2	1	2	3	1	1	1	3	2	1	2	2	2	3	1	3	1	1	3	2
257	183	1	33	Hunan	Changsha	1	1	3	1	1	1	1	2	0	0	0	1	0	0	2	2	2	1	1	1	1	1	3	1	1	3	1	1	3	3	1	3	3	1	2	3	3	3	3	3	3	1	1	1
258	249	1	32	Hunan	Changsha	1	1	3	2	2	1	1	2	1	0	1	1	1	0	1	2	1	1	1	1	1	1	1	1	1	1	1	1	1	1	1	1	1	1	1	1	1	1	1	1	1	1	1	1
259	832	1	29	Hunan	Changsha	1	1	2	1	2	1	1	2	1	1	1	1	0	0	1	2	1	1	1	1	1	1	1	1	2	1	2	2	1	1	1	3	2	1	1	2	2	2	1	3	2	1	2	2
260	459	1	38	Hunan	Changsha	1	1	3	2	2	1	1	1	1	0	0	0	0	0	1	2	1	1	1	1	1	1	3	1	1	1	2	3	1	3	1	1	1	1	1	2	2	3	1	3	1	1	2	1
261	311	1	25	Zhejiang	Changsha	1	2	1	1	2	1	1	1	1	0	0	0	0	0	1	2	1	1	1	1	1	1	1	1	2	1	2	2	1	2	1	1	1	1	1	2	2	1	1	2	1	1	2	1
262	796	1	49	Hunan	Changsha	1	1	4	3	2	2	1	1	1	0	0	0	0	0	1	2	1	1	1	1	1	1	1	1	2	1	2	2	1	2	1	1	2	1	1	2	2	1	1	2	1	1	2	1
263	762	1	33	Hunan	Changsha	1	1	2	2	3	1	1	1	1	0	1	1	1	0	1	1	1	1	1	2	1	1	1	1	2	1	2	2	1	2	1	1	2	1	1	2	2	1	1	2	1	1	2	2
264	588	1	34	Hunan	Changsha	1	1	2	1	2	1	2	2	0	1	0	1	1	1	1	2	1	1	1	1	1	1	1	1	2	2	1	2	1	1	1	1	2	1	2	1	2	2	2	2	1	1	2	2
265	577	1	40	Hunan	Changsha	1	1	4	3	2	2	1	1	1	1	1	1	0	0	1	1	1	1	1	1	1	1	1	1	2	1	2	2	1	1	1	1	2	1	1	2	2	1	1	2	1	1	2	1
266	316	1	23	Hunan	Changsha	1	1	1	1	2	1	1	1	1	0	1	1	0	0	1	2	1	1	1	2	1	1	1	1	2	1	2	2	1	2	1	1	2	1	1	2	2	1	1	2	1	1	1	1
267	329	1	30	Zhejiang	Changsha	1	2	2	1	2	1	1	1	1	0	0	0	0	0	1	2	1	1	1	1	1	1	3	1	1	1	1	1	1	1	1	2	2	1	1	2	1	1	1	3	1	1	2	2
268	458	1	42	Hunan	Changsha	1	1	4	2	2	1	1	1	1	1	1	1	0	0	1	1	2	1	1	2	1	1	1	1	1	1	2	2	1	1	1	1	2	1	1	2	2	1	1	2	1	1	2	2
269	381	1	44	Zhejiang	Changsha	1	1	4	2	2	1	1	1	1	0	0	0	0	0	1	2	1	1	1	2	1	1	1	1	2	1	2	2	1	3	1	1	2	1	1	2	2	1	1	2	1	1	2	2
270	578	1	25	Hunan	Changsha	1	1	1	1	2	1	1	2	1	0	0	0	0	0	1	2	1	1	1	2	1	1	1	1	2	1	2	2	1	2	1	1	2	1	1	2	2	1	1	1	3	1	2	1
271	364	1	39	Zhejiang	Changsha	1	1	3	2	2	1	1	1	1	1	0	1	0	0	1	2	1	1	1	1	1	1	1	1	2	1	2	2	1	1	1	1	2	2	1	2	2	1	1	2	1	1	2	2
272	317	1	31	Hunan	Changsha	1	1	2	1	2	1	1	1	1	0	1	0	0	0	1	2	1	1	1	2	1	1	1	1	2	1	2	2	1	2	1	1	1	1	1	2	2	1	1	2	1	1	2	4
273	217	1	33	Hunan	Changsha	1	1	3	2	2	1	2	1	1	1	1	0	0	0	1	1	1	1	1	1	1	1	1	1	1	1	1	1	1	1	1	1	1	1	1	1	1	1	1	2	1	1	1	4
274	674	1	28	Zhejiang	Changde	1	2	2	1	1	1	1	1	1	0	0	1	0	0	1	2	1	1	1	2	1	1	1	2	2	1	2	2	1	1	1	1	2	3	1	2	2	2	1	2	1	1	2	2
275	778	1	26	Hunan	Changde	1	1	1	1	1	1	1	1	1	0	0	1	0	0	1	2	1	1	1	1	1	1	1	2	2	1	2	2	1	1	1	1	2	2	1	1	1	1	1	1	1	1	1	1
276	342	1	41	Hunan	Changde	1	1	4	2	2	1	1	1	1	0	0	0	0	0	1	2	1	1	1	1	1	1	1	2	2	1	2	2	1	1	1	1	2	2	1	2	2	1	1	2	1	1	2	2
277	508	1	44	Hunan	Changde	1	1	4	2	2	1	2	2	1	0	0	0	0	0	2	1	2	1	1	1	1	1	1	2	2	1	2	2	1	1	1	1	1	1	1	2	2	2	1	2	1	1	1	1
278	633	1	30	Zhejiang	Changde	1	1	2	1	2	1	1	1	1	1	1	1	0	1	1	2	1	1	1	1	1	2	1	2	1	1	2	2	1	1	1	1	2	2	1	2	2	1	1	2	1	1	2	1
279	592	1	29	Hunan	Changsha	1	1	2	1	2	1	1	1	1	1	0	1	0	0	1	2	1	1	1	1	1	1	1	2	2	1	2	1	1	1	1	1	2	2	1	2	2	1	1	1	1	1	2	2
280	490	1	30	Hunan	Changde	1	1	2	1	2	1	1	1	1	0	1	0	0	1	1	1	1	1	1	2	1	1	1	2	2	1	2	2	1	2	1	1	2	3	1	2	2	2	1	2	1	1	2	1
281	418	1	38	Hunan	Changde	1	1	4	2	2	1	1	1	1	0	1	0	0	0	1	1	1	1	1	2	1	1	1	2	2	1	2	2	1	2	1	1	2	1	1	2	2	1	1	2	1	1	2	1
282	347	1	31	Hunan	Hengyang	1	1	2	1	2	1	1	1	1	0	0	1	0	0	1	1	1	1	1	2	1	1	1	2	2	1	2	2	1	2	1	1	2	2	1	2	2	1	1	2	1	1	2	2
283	392	1	26	Hunan	Changde	1	1	1	1	2	1	1	1	1	1	0	0	0	0	1	1	1	1	1	2	1	1	1	2	1	1	2	2	1	2	1	1	2	2	1	2	2	1	1	2	1	1	2	5
284	586	1	37	Hunan	Shaoyang	1	1	4	2	2	1	1	1	1	0	0	1	0	0	1	1	1	1	1	1	1	1	1	2	2	1	2	2	1	1	1	1	2	2	1	2	2	1	1	2	1	1	2	1
285	370	1	35	Hunan	Changde	1	1	3	2	2	1	1	1	1	0	0	0	1	0	1	1	1	1	1	2	1	1	2	2	2	1	2	2	1	2	1	2	2	2	1	2	2	1	1	2	1	2	2	2
286	347	1	44	Zhejiang	Changsha	1	1	4	2	2	1	1	1	1	0	1	0	0	0	1	2	1	1	1	2	1	1	1	2	2	1	2	2	1	1	1	1	2	3	1	2	2	1	1	2	1	1	2	2
287	268	1	25	Hunan	Changde	1	1	1	1	2	1	1	1	1	0	1	1	1	0	1	1	1	1	1	2	1	1	1	2	2	1	2	2	1	1	1	1	2	1	1	2	1	1	1	2	1	1	2	1
288	382	1	47	Zhejiang	Changsha	1	1	4	2	2	1	1	1	1	0	1	0	0	0	1	2	1	1	1	2	1	1	1	2	2	1	2	2	1	1	1	1	2	3	1	2	2	1	1	2	1	1	2	2
289	286	1	34	Zhejiang	Changde	1	1	3	2	2	1	1	1	1	0	1	1	0	0	1	2	1	1	1	3	1	1	1	2	2	1	2	1	1	3	1	1	2	2	1	2	2	1	1	2	1	1	2	2
290	623	1	31	Hunan	Changde	1	1	2	2	2	1	1	1	1	1	0	1	0	0	1	1	1	1	1	2	1	1	1	2	2	1	2	2	1	1	1	1	2	1	1	2	2	1	1	2	1	1	2	1
291	225	1	29	Hunan	Hengyang	1	1	2	2	1	1	1	1	1	0	1	1	0	0	1	2	1	1	1	1	1	1	1	2	1	1	1	2	1	1	1	1	2	2	1	2	2	1	1	2	1	1	2	1
292	262	1	26	Hunan	Changde	1	1	1	1	2	1	1	1	1	0	0	0	0	0	1	2	3	3	1	2	1	1	1	2	2	1	2	2	1	1	1	1	2	3	1	2	2	1	1	2	1	1	2	1
293	345	1	40	Zhejiang	Hengyang	1	1	4	2	2	1	1	1	1	1	1	1	1	1	1	1	1	1	1	1	1	1	1	2	1	1	1	1	1	1	1	1	1	2	1	1	1	1	1	1	1	1	1	1
294	595	1	32	Zhejiang	Hengyang	1	2	2	2	2	1	2	2	0	0	1	1	0	0	2	2	1	1	1	1	1	1	1	2	2	1	2	2	1	2	1	1	2	3	1	2	2	1	1	2	1	1	2	2
295	499	1	30	Hunan	Changde	1	1	2	2	2	1	1	1	1	0	0	0	0	0	1	1	1	1	1	2	1	1	1	2	2	1	1	2	1	1	1	1	2	2	1	2	2	1	1	2	1	1	2	2
296	322	1	35	Hunan	Changsha	1	1	3	2	2	1	1	1	1	0	0	0	0	0	1	1	1	1	1	1	1	1	1	2	2	1	2	2	1	1	1	1	2	3	1	2	1	1	1	1	1	1	2	1
297	530	1	23	Hunan	Changde	1	1	1	1	1	1	1	1	1	0	1	0	1	0	1	2	1	1	1	1	1	1	1	2	1	1	3	2	1	1	1	1	1	2	1	2	2	1	1	2	1	1	2	1
298	274	1	27	Zhejiang	Hengyang	1	2	1	1	2	1	2	2	0	1	0	1	1	0	2	2	1	1	1	2	2	1	1	2	2	1	1	2	1	1	1	1	1	2	3	2	2	1	1	2	1	1	1	1
299	258	1	31	Hunan	Xiangtan	1	1	2	2	2	1	1	2	1	0	0	0	0	0	1	2	1	1	1	1	1	1	1	2	2	1	1	1	1	1	1	1	1	3	1	2	2	1	1	2	1	1	3	1
300	274	1	30	Hunan	Changde	1	1	2	2	2	1	1	1	1	0	1	0	0	0	1	2	1	1	1	1	1	1	2	2	2	1	2	2	1	1	1	1	2	2	1	2	2	1	1	2	1	1	1	2
301	472	1	48	Hunan	Changsha	1	1	4	2	2	1	1	2	1	0	1	0	0	0	1	1	1	1	1	1	1	2	1	2	2	1	2	2	1	1	1	3	1	2	2	2	1	1	1	2	1	1	3	2
302	676	1	28	Zhejiang	Changde	1	1	2	1	2	1	1	1	1	1	1	1	1	0	1	2	1	1	1	1	1	1	1	2	2	1	2	2	1	1	1	1	2	2	1	2	2	1	1	1	1	1	2	3
303	281	1	30	Hunan	Changsha	1	1	2	1	2	1	1	1	1	0	0	0	0	0	1	1	1	1	1	1	1	1	1	2	2	1	2	2	1	1	1	1	2	2	1	2	2	1	1	2	1	1	2	1
304	477	1	32	Zhejiang	Xiangtan	1	1	3	1	2	1	2	1	1	0	0	0	0	0	1	2	1	1	1	1	1	1	1	2	1	1	2	2	1	1	1	1	2	2	1	2	2	1	1	1	1	1	1	1
305	338	1	28	Hunan	Changde	1	1	1	1	2	1	1	2	0	0	0	0	1	0	1	2	1	1	1	1	1	1	1	2	2	3	2	2	3	3	1	3	2	2	1	3	2	3	3	2	1	1	2	3
306	492	1	27	Hunan	Changde	1	1	1	1	2	1	1	1	1	0	0	1	0	0	1	2	1	1	1	2	1	1	1	2	1	1	2	2	1	1	1	1	2	1	1	2	2	1	1	2	1	1	2	1
307	331	1	28	Hunan	Changde	1	1	1	1	2	1	1	2	1	0	0	0	0	0	1	2	1	3	1	3	1	3	1	2	2	1	1	2	1	2	3	3	2	2	1	2	2	1	1	3	1	1	3	4
308	551	1	25	Hunan	Changde	1	1	1	1	2	1	1	1	1	0	0	0	0	0	1	2	1	1	1	1	1	1	1	2	2	1	2	2	1	2	1	1	2	1	1	2	2	1	1	2	1	1	2	1
309	559	1	29	Hunan	Changde	1	1	1	1	2	1	1	1	1	0	0	1	0	0	1	2	1	1	1	1	2	1	1	2	2	1	2	2	1	3	1	1	2	3	1	2	2	1	1	2	1	1	2	1
310	226	1	35	Hunan	Changde	1	1	4	2	2	1	1	1	1	0	0	1	0	0	1	2	1	1	1	1	1	1	1	2	2	1	2	2	1	1	1	1	1	2	1	2	2	1	1	2	1	1	2	1
311	463	1	35	Hunan	Xiangtan	1	1	3	2	1	1	1	1	1	0	0	0	0	0	1	1	1	1	1	3	1	1	1	2	2	1	2	2	1	3	2	1	2	3	2	2	2	1	1	1	1	1	2	4
312	993	1	34	Hunan	Shaoyang	1	1	3	2	2	1	1	1	1	0	1	1	0	0	1	1	1	1	1	1	1	1	1	2	1	1	1	1	1	1	1	1	2	2	1	2	2	1	1	2	1	1	1	1
313	547	1	30	Hunan	Changde	2	1	2	1	2	1	1	1	1	0	0	0	0	0	1	2	1	1	1	1	1	1	1	2	1	1	2	2	1	3	1	1	2	2	1	2	2	1	1	3	3	1	3	2
314	708	1	34	Hunan	Changde	1	1	3	2	2	1	1	1	1	0	0	0	0	0	1	1	1	1	1	1	1	1	1	2	2	1	2	2	1	1	1	1	1	1	1	2	2	1	1	2	1	1	2	1
315	557	1	38	Hunan	Changde	1	1	4	2	2	1	1	1	1	0	0	0	0	0	1	2	1	1	1	1	1	1	1	2	2	1	1	1	1	1	1	1	1	3	2	1	2	1	1	2	3	1	1	4
316	259	1	27	Hunan	Changde	1	1	1	1	2	1	1	1	1	0	0	1	0	0	1	2	1	1	1	1	1	1	1	2	2	1	2	2	1	1	1	1	1	1	1	2	1	1	1	1	1	1	1	1
317	358	1	30	Hunan	Hangzhou	1	1	2	1	2	1	1	1	1	0	1	1	0	0	1	2	1	1	1	3	1	1	1	2	2	1	2	2	1	1	1	1	2	2	1	2	2	1	1	2	1	1	2	1
318	294	1	28	Hunan	Changsha	1	1	2	1	2	1	1	1	0	1	0	0	0	0	1	2	3	1	1	3	1	1	1	2	2	1	2	2	1	1	1	3	2	1	2	2	2	1	3	3	3	1	2	3
319	222	1	39	Hunan	Loudi	1	1	4	1	2	1	1	2	1	0	0	0	0	0	1	2	1	1	1	1	1	1	3	2	1	1	1	1	3	3	1	3	1	3	1	2	2	1	1	1	1	1	2	1
320	483	1	48	Zhejiang	Loudi	1	1	4	2	1	1	1	1	1	0	0	0	0	0	1	2	1	1	1	2	1	1	1	2	2	1	2	2	1	1	1	1	2	3	1	2	2	1	1	2	1	1	2	2
321	585	1	31	Hunan	Taizhou	1	1	2	2	2	1	1	1	1	0	0	0	0	0	1	2	1	1	1	2	1	1	1	2	1	1	1	1	1	2	1	1	2	1	1	2	2	3	1	1	1	1	2	2
322	425	1	28	Hunan	Loudi	1	1	2	1	2	1	1	1	1	0	0	0	0	0	1	2	1	1	3	1	1	1	2	2	2	1	1	2	1	1	1	3	2	2	1	2	2	1	1	2	1	1	3	4
323	491	1	35	Hunan	Hangzhou	1	1	3	2	2	1	1	1	1	0	0	0	0	0	1	1	1	1	1	2	1	1	1	2	2	1	2	2	1	1	1	1	2	2	1	2	2	1	2	1	1	1	2	1
324	593	1	27	Hunan	Hangzhou	1	1	2	1	2	1	1	1	1	0	0	0	0	0	1	1	1	1	1	1	1	1	1	2	2	1	2	2	1	1	1	1	2	2	1	2	2	1	1	2	1	1	2	1
325	274	1	33	Hunan	Jishou	1	1	2	2	2	1	1	1	1	1	1	1	1	1	1	1	1	1	1	1	1	1	1	2	1	1	1	1	1	1	1	1	1	2	1	1	1	1	1	1	1	1	1	1
326	586	1	39	Hunan	Wenzhou	1	1	4	2	2	1	1	2	1	0	0	0	0	0	2	2	1	1	1	2	1	1	1	2	2	1	2	2	1	1	1	3	2	2	2	3	2	2	2	1	2	2	1	2
327	304	1	25	Hunan	Hangzhou	1	1	1	1	2	1	1	1	1	0	1	1	1	0	1	2	1	1	1	1	1	1	1	2	2	1	2	2	1	2	1	1	2	2	1	2	2	2	1	2	1	1	2	1
328	325	1	33	Zhejiang	Chenzhou	1	1	2	1	2	1	1	1	1	1	1	1	0	0	1	2	1	1	1	1	1	1	1	2	1	1	1	2	1	1	1	1	2	2	1	2	2	1	1	2	1	1	2	2
329	374	1	27	Zhejiang	Changsha	1	1	2	1	2	1	1	1	1	1	1	1	0	0	1	2	1	1	1	1	1	1	1	2	1	1	2	2	1	1	1	1	2	2	1	2	2	1	1	2	1	1	2	2
330	258	1	37	Zhejiang	Changsha	1	1	3	2	2	1	1	1	1	0	0	1	0	0	1	2	1	1	1	1	1	1	1	2	2	1	2	2	1	2	1	1	2	2	1	2	2	1	1	2	1	1	2	1
331	216	1	42	Hunan	Wenzhou	1	1	4	2	2	1	1	1	1	0	0	1	1	0	1	2	1	1	1	1	1	1	1	2	2	1	2	2	1	1	1	1	2	3	1	2	2	1	1	2	1	1	2	5
332	411	1	40	Hunan	Loudi	1	1	4	2	2	1	1	1	1	0	0	0	0	0	1	2	1	1	1	3	1	1	1	2	2	1	2	2	1	1	1	1	2	3	1	2	2	1	1	2	1	1	2	5
333	303	1	34	Hunan	Changsha	1	1	3	2	3	1	1	1	1	0	0	0	0	0	1	1	1	1	1	1	1	1	1	2	2	2	2	2	1	1	1	1	2	1	2	2	2	1	1	2	1	1	2	1
334	416	1	33	Hunan	Loudi	1	1	2	2	2	1	1	1	1	0	1	1	0	0	1	2	1	1	1	1	1	1	2	2	2	1	2	2	1	1	1	1	2	2	1	2	1	1	1	2	1	1	2	4
335	486	1	33	Hunan	Loudi	1	1	3	2	2	1	1	1	1	0	0	1	0	0	1	1	1	1	1	1	1	1	1	2	2	3	2	2	1	1	1	1	2	2	1	2	2	1	1	2	1	1	2	2
336	339	1	37	Hunan	Changde	1	1	4	3	2	2	1	1	1	1	1	0	0	0	1	2	1	1	1	1	1	1	1	2	1	1	2	2	1	2	1	1	2	1	1	2	2	1	1	2	1	1	2	1
337	196	1	25	Hunan	Loudi	1	1	1	1	1	1	1	1	1	1	1	1	1	0	1	1	1	1	1	1	1	1	1	2	2	1	2	2	1	1	1	1	1	2	1	1	1	1	1	1	1	1	1	1
338	459	1	35	Hunan	Taizhou	1	1	3	2	2	1	1	1	1	0	1	1	0	0	1	2	1	1	1	1	1	1	1	2	2	1	2	2	1	2	1	3	2	1	1	2	2	1	1	2	1	1	2	1
339	293	1	25	Hunan	Wenzhou	1	1	1	1	2	1	1	1	1	0	1	1	0	0	1	1	1	1	1	1	1	1	1	2	2	1	2	2	1	2	1	1	2	2	1	2	1	1	1	2	1	1	2	1
340	760	1	28	Hunan	Wenzhou	1	1	2	1	2	1	1	1	1	1	1	0	0	0	1	1	1	1	1	1	1	1	1	2	2	1	2	2	1	2	1	1	1	1	1	2	2	1	1	2	1	1	1	1
341	241	1	28	Hunan	Wenzhou	1	1	2	1	2	1	1	1	1	1	0	0	0	0	1	1	1	1	1	1	1	1	1	2	2	1	2	1	1	2	1	1	2	2	1	1	1	1	1	2	1	1	2	1
342	856	1	24	Hunan	Changde	1	1	1	1	2	1	1	1	1	0	1	1	0	0	1	1	1	1	1	1	1	1	1	2	2	1	2	2	1	2	1	1	2	2	1	2	2	1	1	1	1	1	2	2
343	395	1	30	Hunan	Loudi	1	1	2	2	2	1	1	1	1	0	1	1	0	0	1	2	1	1	1	2	1	2	1	2	2	1	2	2	1	2	1	1	2	2	1	2	2	1	2	2	2	1	2	1
344	360	1	43	Hunan	Xiangtan	1	1	4	2	2	1	1	1	1	0	1	0	0	0	1	2	1	1	1	1	2	1	1	2	1	1	1	1	1	2	1	1	1	3	2	2	1	2	2	3	2	1	2	2
345	906	1	26	Zhejiang	Loudi	1	2	1	1	2	1	1	1	1	1	1	0	0	0	1	2	1	1	1	1	1	1	1	2	2	1	2	2	1	1	1	1	2	2	1	2	2	1	1	2	1	1	2	1
346	420	1	29	Hunan	Shaoxing	1	1	2	2	2	1	1	1	1	0	0	0	0	0	1	2	1	1	1	1	1	3	1	2	3	1	2	3	1	2	1	3	2	2	1	2	1	1	3	3	1	3	3	4
347	438	1	45	Zhejiang	Changsha	1	2	4	2	2	2	1	1	1	1	0	1	0	0	1	2	1	1	1	2	1	1	1	2	1	1	2	1	1	2	1	1	2	2	1	2	2	1	1	2	1	1	2	1
348	369	1	35	Hunan	Shaoxing	1	1	3	2	2	1	1	1	1	0	1	1	0	0	1	1	1	1	1	1	1	1	1	2	2	1	2	2	1	2	1	1	2	2	1	2	2	1	1	2	1	1	2	1
349	686	1	48	Hunan	Hangzhou	1	1	4	3	2	2	1	1	1	0	1	0	0	0	1	2	1	1	1	1	1	1	1	2	2	1	2	2	1	2	1	1	2	2	1	2	2	1	1	2	1	1	2	2
350	449	1	46	Zhejiang	Changsha	1	1	4	3	2	2	1	1	1	1	1	1	0	0	1	2	1	1	1	1	1	1	1	2	2	1	2	2	1	1	1	1	2	1	1	2	2	1	1	2	1	1	2	1
351	185	1	42	Hunan	Changsha	1	1	4	2	3	2	1	1	1	1	1	0	0	0	1	1	1	2	1	2	1	1	1	2	2	1	2	2	1	2	1	1	2	1	1	2	2	1	1	2	1	1	2	2
352	231	1	25	Hunan	Yueyang	1	1	1	1	2	1	1	1	1	1	1	0	0	0	1	2	1	1	1	1	1	1	1	2	2	1	2	2	1	2	1	1	2	3	1	2	2	1	1	2	1	1	2	4
353	242	1	30	Zhejiang	Yueyang	1	2	2	1	2	1	1	1	1	0	0	0	0	0	1	2	1	1	1	1	1	1	1	2	1	1	1	1	1	1	1	1	1	3	1	1	1	1	1	1	1	1	1	1
354	324	1	34	Hunan	Taizhou	1	1	3	2	2	1	1	1	1	0	1	1	0	0	1	2	1	2	1	2	1	1	1	2	2	1	2	2	1	2	1	1	2	2	1	2	2	1	2	1	1	1	2	1
355	354	1	34	Zhejiang	Yueyang	1	2	3	2	2	1	1	1	1	1	1	1	0	0	1	2	1	1	1	1	1	1	1	2	2	1	1	1	1	1	1	1	1	2	1	1	1	1	1	1	1	1	1	1
356	441	1	38	Zhejiang	Changde	1	2	4	2	2	2	1	2	1	1	1	1	0	0	2	2	1	1	1	1	1	1	1	2	2	1	1	1	1	3	1	3	1	2	1	2	2	1	1	2	1	1	2	1
357	196	1	40	Zhejiang	Taizhou	2	2	3	2	2	1	1	1	1	0	1	1	0	0	2	2	1	1	1	1	1	1	1	2	2	1	2	1	1	1	1	1	2	2	1	2	2	1	1	2	1	1	1	2
358	460	1	35	Hunan	Wenzhou	1	1	3	2	3	1	1	1	1	0	0	1	0	0	1	1	1	1	1	1	1	1	1	2	2	1	2	2	1	1	1	1	2	3	1	2	2	1	1	2	1	1	2	2
359	328	1	32	Zhejiang	Hangzhou	1	2	2	2	2	1	1	2	1	0	1	1	0	0	1	2	1	1	1	1	2	1	1	2	2	1	2	2	1	1	1	1	2	2	2	2	1	1	1	1	1	1	2	1
360	309	1	34	Hunan	Hangzhou	1	1	3	2	2	1	1	1	1	1	0	0	0	0	1	1	1	1	1	2	1	1	1	2	2	1	2	2	1	2	1	1	2	2	1	2	2	1	2	2	1	3	2	1
361	373	1	27	Hunan	Changsha	1	1	1	1	2	1	1	1	1	0	1	0	0	0	1	1	1	1	1	1	1	1	1	2	3	1	2	2	1	2	1	1	2	2	1	2	2	1	1	2	1	1	3	3
362	217	1	30	Hunan	Taizhou	1	1	2	2	2	1	1	2	1	0	1	0	0	1	1	1	1	1	1	1	1	1	1	2	2	1	2	2	1	2	1	1	1	2	1	1	2	1	1	2	1	1	2	1
363	420	1	23	Hunan	Changsha	1	1	1	1	2	1	1	1	1	0	0	1	1	0	1	1	1	1	1	1	1	1	1	2	2	1	2	2	1	3	1	3	2	1	1	2	2	1	1	2	1	1	2	1
364	391	1	39	Zhejiang	Hangzhou	2	2	4	2	2	1	1	1	0	1	1	1	1	0	2	2	1	1	1	1	1	1	1	2	2	1	2	2	1	1	1	1	2	2	1	2	2	1	1	2	1	1	2	1
365	645	1	34	Zhejiang	Changsha	2	2	3	2	2	1	1	2	0	0	0	1	1	0	2	2	1	3	1	1	1	1	3	2	2	2	2	3	1	1	1	3	2	2	3	2	2	2	1	3	1	1	3	1
366	723	1	33	Zhejiang	Hangzhou	1	2	2	2	2	1	1	2	0	0	0	0	0	1	2	2	1	1	1	1	1	1	1	2	3	1	2	2	3	1	1	1	2	2	1	2	2	1	1	3	1	1	3	1
367	691	1	24	Hunan	Hangzhou	1	1	1	1	2	1	1	1	1	1	1	1	1	0	1	2	1	1	1	1	1	1	1	2	2	1	2	2	1	1	1	1	2	3	1	2	2	1	1	3	1	1	2	1
368	504	1	48	Zhejiang	Jishou	1	2	4	3	2	1	1	1	1	1	1	1	0	0	2	2	1	1	1	1	1	1	1	2	1	1	2	1	1	1	1	1	2	2	1	2	2	1	1	2	1	1	2	1
369	311	1	31	Hunan	Jishou	1	1	2	2	2	1	1	1	1	0	0	0	0	0	1	2	1	1	1	1	1	1	1	2	1	1	1	1	1	1	1	1	1	2	1	1	1	1	1	3	1	1	1	2
370	546	1	47	Zhejiang	Jishou	1	2	4	2	2	1	1	2	0	0	1	1	0	0	2	2	1	1	1	2	1	2	1	2	2	1	2	2	1	1	1	1	1	3	1	2	2	1	1	1	1	1	1	1
371	470	1	34	Hunan	Hangzhou	1	1	3	2	2	1	1	1	1	0	0	1	0	0	1	1	1	1	1	1	1	1	1	2	2	1	2	2	1	1	1	3	2	1	1	2	2	1	1	3	1	1	3	2
372	442	1	41	Zhejiang	Hangzhou	1	2	4	2	2	1	1	2	0	0	1	1	0	1	2	2	1	1	1	1	1	1	1	2	2	1	1	1	1	1	1	1	2	2	1	2	2	1	1	1	1	1	1	1
373	595	1	50	Zhejiang	Changsha	1	2	4	2	2	1	1	1	0	0	0	0	1	0	2	2	1	1	1	1	1	1	1	2	2	1	2	2	1	1	1	1	2	1	2	2	2	1	1	2	1	1	2	3
374	304	1	37	Zhejiang	Hangzhou	1	2	3	2	2	1	1	2	0	1	1	0	0	0	2	2	1	1	1	1	1	1	1	2	2	1	2	2	1	1	1	1	1	2	1	2	2	1	1	2	1	1	1	2
375	215	1	26	Hunan	Xiangtan	1	1	1	1	2	1	1	1	1	1	0	1	0	0	1	2	1	1	1	1	1	1	1	2	2	1	2	2	1	1	1	1	2	2	1	2	2	1	1	2	1	1	2	1
376	465	1	31	Zhejiang	Yiyang	1	2	3	1	2	1	1	1	1	0	0	0	0	0	2	2	1	1	1	1	1	1	1	2	3	1	1	1	1	1	1	1	2	2	2	3	2	3	3	3	3	3	3	3
377	455	1	33	Hunan	Yiyang	1	1	3	2	2	1	1	1	1	0	0	0	0	0	1	1	1	1	1	1	1	1	1	2	2	1	2	2	1	1	1	1	2	1	1	2	2	1	1	1	2	1	1	1
378	674	1	33	Hunan	Yiyang	1	1	3	2	1	1	1	1	1	1	1	0	0	0	1	2	1	1	1	2	1	1	1	2	1	1	2	2	1	1	1	2	2	3	2	1	2	1	1	1	1	1	1	1
379	259	1	27	Hunan	Yiyang	1	1	1	1	2	1	1	2	1	0	1	1	0	0	1	2	2	1	1	1	1	1	1	2	2	1	2	2	1	2	1	1	2	3	1	2	2	1	1	1	1	1	2	1
380	466	1	38	Hunan	Changsha	2	2	3	2	2	1	3	2	0	0	0	1	0	0	2	2	1	1	1	1	1	1	1	2	2	1	2	2	1	1	1	1	1	1	1	2	2	1	1	2	1	1	2	1
381	415	1	36	Zhejiang	Hangzhou	2	2	3	2	2	2	1	1	0	0	0	0	0	1	2	2	1	2	1	2	1	1	1	2	2	1	2	2	1	2	1	3	2	3	1	2	2	1	1	2	1	1	2	1
382	534	1	38	Zhejiang	Xiangtan	2	2	3	3	2	2	1	1	0	1	1	1	1	0	2	2	1	1	1	2	1	1	1	2	2	1	2	2	1	3	1	1	2	2	1	2	2	1	1	2	1	1	2	1
383	296	1	35	Zhejiang	Yiyang	1	2	3	1	2	1	1	1	1	0	1	1	0	0	1	2	1	1	1	1	1	1	1	2	2	1	2	2	1	2	1	1	2	2	1	2	2	1	1	2	1	1	2	1
384	333	1	40	Zhejiang	Changsha	2	2	4	2	2	1	3	1	0	0	1	1	0	0	2	2	1	1	1	1	1	1	1	2	2	1	2	1	1	1	1	1	2	3	2	2	1	1	1	1	1	1	2	2
385	330	1	38	Zhejiang	Changsha	2	2	3	2	2	2	2	2	0	1	1	1	0	0	2	2	1	1	3	1	2	1	1	2	2	2	2	2	1	2	1	1	2	3	1	2	2	2	2	2	1	1	3	2
386	365	1	42	Zhejiang	Yiyang	1	2	4	3	2	2	1	1	1	1	0	1	0	0	2	2	1	1	1	1	1	1	1	2	2	1	2	2	1	3	1	1	2	2	1	2	2	2	1	2	1	1	2	1
387	765	1	48	Zhejiang	Jishou	2	2	4	2	1	2	2	2	0	1	1	1	0	0	2	2	1	1	1	1	1	1	1	2	1	1	2	2	1	1	1	1	2	3	1	2	2	3	1	3	3	1	3	2
388	474	1	26	Zhejiang	Jishou	2	2	1	1	1	1	2	2	0	0	0	0	1	0	2	2	1	1	1	3	1	1	2	2	2	1	2	3	1	3	1	1	2	3	1	2	2	1	1	3	1	1	2	2
389	665	1	25	Hunan	Jishou	1	1	1	1	2	1	1	1	1	1	1	1	1	0	1	1	1	1	1	2	1	1	1	2	2	1	2	2	1	1	1	1	2	2	1	2	2	1	1	2	1	1	2	2
390	355	1	30	Hunan	Jishou	2	2	1	1	1	1	2	2	0	0	0	1	0	0	2	2	3	3	3	3	2	1	1	2	1	1	2	2	1	2	1	1	1	2	2	2	2	2	1	1	3	2	1	2
391	299	1	30	Zhejiang	Hangzhou	1	1	2	2	2	1	1	1	1	0	0	0	0	0	1	2	1	1	1	1	1	1	1	2	2	1	1	1	1	1	1	1	2	2	1	1	2	2	1	1	1	1	1	2
392	552	1	51	Zhejiang	Changde	1	1	4	3	2	2	1	1	1	0	0	0	0	0	1	2	2	1	1	1	1	1	1	2	2	1	2	2	1	3	1	1	2	2	1	2	2	1	1	2	1	1	2	1
393	426	1	35	Zhejiang	Jishou	2	2	3	2	2	2	3	2	0	1	1	1	0	0	2	2	1	2	1	1	1	1	1	2	1	1	2	2	1	2	1	1	2	2	1	2	1	1	1	2	1	1	2	1
394	372	1	57	Zhejiang	Zhuzhou	2	2	4	3	2	2	3	2	0	0	0	1	0	1	2	2	1	1	1	1	1	2	1	2	2	1	2	2	1	2	1	1	2	1	1	2	2	1	1	1	1	1	2	2
395	221	1	25	Hunan	Zhuzhou	2	1	1	1	1	1	1	1	1	0	0	0	0	0	1	2	1	1	1	1	1	1	1	2	2	1	2	2	1	1	1	1	2	1	1	2	1	1	1	1	1	1	2	1
396	374	1	23	Hunan	Changsha	2	1	1	1	2	1	1	1	1	0	0	0	0	0	1	2	1	1	1	1	1	1	1	2	2	1	2	2	1	2	1	1	2	1	2	2	2	1	2	1	2	1	1	3
397	649	1	36	Hunan	Shaoxing	2	1	4	2	2	1	1	1	1	0	0	0	0	0	1	2	1	1	1	1	1	1	1	2	2	1	2	2	1	1	1	1	3	2	1	2	2	2	1	2	1	2	2	2
398	479	1	24	Zhejiang	Shaoxing	2	2	1	1	1	1	1	2	0	0	0	1	0	1	2	1	1	1	1	1	1	1	1	2	1	1	2	2	1	1	1	1	2	2	1	2	2	1	1	2	1	1	1	1
399	560	1	38	Zhejiang	Changsha	1	2	4	2	3	2	1	1	1	1	0	0	0	0	1	2	2	2	1	1	1	1	1	2	1	1	2	1	1	2	1	1	2	2	1	2	1	1	1	3	3	1	2	2
400	474	1	31	Zhejiang	Hangzhou	1	2	2	2	2	1	2	1	0	0	0	1	1	0	2	2	1	1	1	1	1	1	1	2	2	1	2	2	1	3	1	1	2	3	1	2	2	1	1	2	1	1	2	2
401	416	1	34	Zhejiang	Changsha	1	2	3	2	2	1	1	1	1	0	0	0	0	0	1	2	3	1	1	3	1	1	1	2	2	1	2	1	1	1	1	1	3	2	1	2	1	1	1	1	1	1	2	2
402	202	1	32	Zhejiang	Yueyang	1	2	3	2	2	1	1	2	1	1	1	1	0	1	2	2	1	1	1	2	1	1	1	2	2	1	2	1	1	1	1	1	2	1	1	1	1	1	1	1	2	1	2	1
403	528	1	38	Hunan	Changsha	2	1	3	2	2	1	1	2	1	0	0	0	1	0	1	2	1	1	1	3	1	1	1	2	1	1	1	1	1	1	1	1	1	2	1	2	2	1	1	2	1	1	2	2
404	532	1	30	Zhejiang	Shaoxing	1	2	2	1	3	1	2	2	1	1	1	1	0	0	1	1	1	1	1	3	1	2	1	2	1	1	2	2	1	3	1	1	2	2	1	2	2	1	1	2	1	1	2	1
405	272	1	30	Zhejiang	Changsha	1	2	1	1	3	1	3	2	0	0	0	1	1	0	2	2	1	1	1	1	1	1	1	2	1	1	1	2	3	1	1	1	2	2	1	2	2	1	1	2	3	1	2	1
406	225	1	29	Zhejiang	Yueyang	1	2	2	1	2	1	3	1	1	1	0	0	0	0	1	2	1	1	1	1	1	1	1	2	2	1	1	1	1	1	1	1	1	1	1	1	1	1	1	1	1	1	1	1
407	281	1	32	Zhejiang	Changsha	1	2	2	1	2	1	1	1	1	0	0	0	0	0	1	2	1	1	1	1	1	1	1	2	2	1	1	2	1	1	1	1	2	2	1	2	2	1	1	2	1	1	2	1
408	370	1	29	Hunan	Changsha	1	1	2	1	2	1	3	2	0	0	0	0	1	0	1	2	3	2	1	2	3	2	1	2	2	1	2	2	1	3	3	3	3	3	3	3	3	3	3	3	3	3	3	3
409	426	1	38	Hunan	Changsha	1	1	4	2	2	1	3	2	1	0	1	1	0	0	1	2	3	1	2	1	1	1	1	2	2	1	2	1	1	2	1	1	2	2	2	1	2	1	1	2	1	1	2	2
410	299	1	38	Hunan	Changsha	1	1	4	2	2	1	3	2	1	1	0	0	0	0	1	2	1	1	1	1	1	2	1	2	3	1	2	2	1	1	1	1	2	2	1	2	2	1	1	1	1	1	2	1
411	457	1	37	Hunan	Changsha	1	1	4	2	2	1	3	2	1	1	0	0	1	0	2	2	3	1	3	2	1	2	1	2	2	1	2	2	1	2	1	1	2	2	1	2	2	1	1	2	1	1	2	4
412	233	1	35	Zhejiang	Shaoxing	1	2	2	2	3	1	2	2	1	0	1	1	0	0	2	2	1	1	1	1	2	1	1	2	2	1	2	2	1	1	1	1	2	2	1	2	2	2	1	2	1	1	2	1
413	558	1	47	Hunan	Changsha	1	1	4	3	3	1	3	1	1	1	1	1	1	1	1	2	1	1	1	2	1	1	1	2	2	1	2	2	1	3	1	1	2	1	1	2	1	1	1	3	1	1	1	1
414	337	1	24	Zhejiang	Changsha	1	2	1	1	3	1	3	2	1	1	0	0	1	0	2	2	1	1	1	1	1	1	1	2	2	1	2	2	1	2	1	1	2	1	1	2	2	1	1	2	1	1	2	2
415	528	1	33	Zhejiang	Changsha	1	1	3	2	2	1	1	1	1	1	0	0	0	0	2	2	1	1	1	1	1	1	1	2	3	1	2	2	1	1	1	1	1	3	1	2	2	1	1	3	1	1	2	1
416	606	1	30	Zhejiang	Shaoxing	1	1	2	1	2	1	1	2	0	1	0	0	0	0	1	2	1	1	1	1	1	1	1	2	2	1	2	2	1	1	1	1	2	2	1	3	2	1	1	2	1	1	2	4
417	540	1	25	Zhejiang	Changsha	1	1	1	1	2	1	1	2	1	0	0	1	0	0	1	2	1	1	1	1	1	1	1	2	2	1	2	2	1	1	1	1	2	2	2	2	2	1	2	2	1	1	2	1
418	350	1	37	Zhejiang	Yueyang	1	1	3	2	2	1	2	1	1	0	1	1	1	0	2	1	1	1	1	1	1	1	1	2	2	1	1	1	1	1	1	1	1	1	1	2	2	1	1	2	1	1	1	1
419	301	1	36	Zhejiang	Yueyang	1	1	3	2	2	1	1	1	1	1	1	1	0	0	1	2	1	1	1	1	1	1	1	2	2	1	2	1	1	3	1	1	2	2	1	2	2	1	3	3	1	1	2	2
420	649	1	31	Zhejiang	Changsha	1	1	2	1	2	1	1	1	1	0	1	0	0	0	1	2	1	1	1	1	1	1	1	2	2	1	2	2	1	1	1	1	2	1	1	2	2	1	1	2	1	1	2	2
421	675	1	36	Zhejiang	Changsha	1	1	4	2	2	1	2	1	1	0	0	0	0	0	1	2	1	1	1	2	1	1	1	2	2	1	2	2	1	3	1	1	1	1	1	2	2	2	1	2	1	1	2	1
422	412	1	37	Zhejiang	Changsha	1	1	4	1	2	1	1	2	1	1	1	1	0	0	1	2	1	1	1	1	1	1	1	2	1	1	2	1	1	1	1	1	2	1	1	2	2	1	1	1	1	1	1	1
423	415	2	27	Zhejiang	Shaoxing	1	1	1	1	2	1	3	1	1	0	0	1	0	0	1	2	1	1	1	3	1	1	1	2	2	1	2	2	1	3	1	1	2	2	1	2	2	1	1	2	1	1	2	1
424	466	1	37	Zhejiang	Changsha	1	1	3	2	2	1	1	1	1	0	1	1	0	0	1	2	1	1	1	2	1	1	1	2	2	1	2	2	1	2	1	1	2	1	1	2	2	1	1	1	1	1	1	1
425	261	2	28	Zhejiang	Shaoxing	1	1	1	1	2	1	3	1	1	1	1	1	1	0	1	1	1	1	1	1	1	1	1	2	1	1	1	1	1	1	1	1	1	2	1	1	1	1	1	1	1	1	1	3
426	253	1	30	Zhejiang	Shaoxing	1	1	2	1	2	1	1	1	1	0	1	1	0	0	1	2	1	1	1	1	1	1	1	2	2	1	2	1	1	1	1	1	2	3	1	2	2	1	1	1	1	1	2	2
427	184	1	27	Zhejiang	Shaoxing	1	1	1	1	2	1	1	2	1	1	1	1	1	0	2	2	1	1	1	1	1	1	1	2	2	1	2	2	1	1	1	1	2	2	1	2	2	1	1	1	1	1	1	1
428	835	1	34	Zhejiang	Changsha	1	1	3	2	2	1	1	1	1	0	1	1	0	0	1	2	1	1	1	1	1	1	1	2	2	1	1	2	1	1	1	1	2	1	1	2	2	1	1	2	1	1	2	1
429	280	1	34	Zhejiang	Shaoxing	1	1	3	1	2	1	1	1	1	0	0	0	0	1	1	1	1	1	1	1	1	1	1	2	1	1	1	1	1	1	1	1	1	1	1	2	1	1	1	1	1	1	1	2
430	644	2	20	Zhejiang	Changsha	1	1	1	1	3	1	1	1	1	1	0	0	1	0	1	2	1	1	1	1	1	1	1	2	2	1	2	2	1	2	1	1	2	3	1	2	2	1	1	2	1	1	2	1
431	353	1	22	Zhejiang	Shaoxing	1	1	1	1	2	1	1	1	0	0	0	0	1	0	1	2	1	1	1	3	1	1	1	2	2	1	2	2	1	2	1	1	2	3	2	2	1	1	1	2	1	1	3	2
432	276	1	29	Zhejiang	Shaoxing	1	1	2	1	2	1	1	1	1	1	1	1	0	0	1	1	1	1	1	1	1	1	1	2	1	1	2	2	1	2	1	1	2	3	1	2	2	1	1	2	1	1	2	1
433	256	1	25	Zhejiang	Changsha	1	1	1	1	2	1	1	1	1	0	1	0	1	0	2	2	1	1	1	2	1	1	1	2	2	1	2	2	1	2	1	1	2	2	1	2	2	1	1	2	2	1	2	1
434	744	1	37	Zhejiang	Wenzhou	2	2	3	2	2	1	1	2	0	1	0	0	0	0	2	2	3	1	1	1	1	1	1	2	2	1	2	3	1	3	3	1	3	2	1	3	3	3	3	3	3	3	1	1
435	638	1	31	Zhejiang	Wenzhou	1	1	3	1	2	1	1	1	0	1	0	0	0	0	1	1	1	1	1	3	1	2	1	2	2	1	2	2	1	2	1	1	2	2	1	2	2	1	1	2	1	1	2	3
436	487	1	41	Zhejiang	Wenzhou	1	1	3	2	2	1	1	1	1	1	0	0	0	0	1	2	1	2	1	2	2	1	1	2	2	1	2	2	1	1	1	1	2	2	1	2	2	1	1	3	1	1	1	1
437	459	1	30	Zhejiang	Wenzhou	1	2	1	2	3	2	1	1	0	0	1	1	1	0	1	2	1	1	1	1	1	2	1	2	2	1	2	2	1	1	1	1	2	2	1	2	2	1	1	2	1	1	2	1
438	314	1	33	Hunan	Hangzhou	1	2	2	1	2	1	2	1	0	1	1	0	0	0	2	2	1	1	1	1	1	1	1	2	1	1	2	2	1	3	1	1	1	2	1	2	2	2	1	2	1	1	2	4
439	367	1	30	Zhejiang	Changde	1	1	2	1	2	1	1	1	1	0	0	0	0	0	1	2	1	1	1	1	1	1	1	2	2	1	2	2	1	1	1	1	2	2	1	2	2	2	1	2	1	1	2	2
440	186	1	33	Zhejiang	Hangzhou	2	2	3	2	2	1	1	2	1	0	1	0	0	0	2	2	1	1	1	1	1	1	1	2	2	1	2	2	1	1	1	1	2	2	1	2	1	1	1	1	1	1	2	1
441	393	1	30	Zhejiang	Zhuzhou	1	1	2	1	2	1	1	1	1	0	1	0	0	0	1	1	1	1	1	2	1	1	1	2	1	1	2	1	1	2	1	1	2	3	1	2	2	2	1	2	1	1	2	1
442	283	2	22	Zhejiang	Taizhou	1	1	1	1	2	1	1	2	1	0	1	1	1	0	1	1	1	1	1	1	1	1	1	2	2	1	2	2	1	1	1	1	2	2	1	2	2	1	1	2	1	1	2	4
443	345	1	23	Zhejiang	Ningbo	1	1	1	1	2	1	1	1	1	1	1	1	1	0	1	2	1	1	1	1	1	1	1	2	2	1	2	2	1	1	1	1	1	3	1	2	2	1	1	2	1	1	2	3
444	487	1	28	Hunan	Wenzhou	1	1	2	1	2	1	1	1	1	1	1	1	1	0	1	2	1	1	1	1	1	1	1	2	2	1	2	2	1	1	1	1	2	3	1	2	2	1	1	2	1	1	2	4
445	212	1	35	Hunan	Xiangtan	1	1	3	2	2	1	1	1	0	1	0	0	0	0	2	2	1	1	1	1	1	1	1	2	1	1	2	1	1	1	1	1	2	2	1	2	2	1	1	1	1	1	1	1
446	425	1	34	Hunan	Wenzhou	1	1	2	2	2	1	1	1	1	1	1	0	0	0	1	2	1	1	1	1	1	1	1	2	2	1	1	2	1	1	1	1	2	2	1	2	2	1	1	1	1	1	2	2
447	645	1	31	Hunan	Wenzhou	1	1	2	1	2	1	1	1	1	0	0	1	0	0	1	2	2	2	1	1	1	2	1	2	2	1	2	2	1	1	1	1	2	2	1	2	2	1	2	2	2	1	2	2
448	354	1	33	Zhejiang	Wenzhou	1	1	2	2	2	2	1	2	0	1	1	1	0	0	1	1	1	1	1	1	1	3	1	2	2	1	2	2	1	3	1	1	2	3	1	2	2	1	1	2	1	1	2	1
449	317	1	28	Hunan	Wenzhou	1	1	2	1	2	1	1	2	1	1	0	0	0	0	1	2	1	1	1	1	1	1	1	2	2	1	2	2	1	1	1	1	1	1	1	2	2	1	1	1	2	1	2	1
450	556	1	32	Hunan	Hangzhou	1	1	2	1	2	1	1	1	1	1	1	1	0	0	1	2	1	1	1	1	1	1	1	2	2	1	2	2	1	2	1	1	2	2	1	2	2	1	1	2	1	1	2	2
451	523	1	32	Hunan	Hangzhou	1	1	3	2	2	1	2	1	1	0	0	1	0	0	1	2	1	1	1	1	1	1	1	2	2	1	2	2	1	1	1	1	2	2	1	2	2	2	2	1	1	1	2	4
452	261	1	28	Hunan	Hangzhou	1	1	2	1	2	1	1	1	1	1	0	0	0	0	1	2	1	1	1	2	1	1	1	2	2	1	2	2	1	1	1	1	2	2	1	2	2	1	1	2	1	1	2	2
453	394	1	42	Hunan	Wenzhou	1	1	4	2	1	1	2	2	1	0	1	0	0	0	1	2	1	1	1	1	2	1	1	2	2	2	2	2	1	1	1	2	2	2	1	2	2	1	1	2	2	1	1	3
454	481	1	48	Hunan	Wenzhou	1	1	4	3	2	1	1	1	1	0	1	0	0	0	1	2	1	1	1	1	1	1	1	2	2	1	2	2	1	1	1	1	2	2	1	2	2	1	1	2	1	1	2	1
455	475	1	45	Hunan	Taizhou	1	1	4	3	1	2	1	1	1	0	1	1	1	0	1	2	1	1	1	3	1	1	1	2	2	1	2	2	1	1	1	1	2	2	1	2	1	1	1	2	1	3	2	2
456	265	1	37	Zhejiang	Changsha	1	1	4	2	2	2	1	2	1	0	0	0	0	0	1	2	1	1	1	1	1	2	1	2	2	1	2	2	1	3	1	1	2	2	1	2	2	2	1	2	1	1	2	1
457	337	1	36	Hunan	Shaoxing	2	2	3	2	2	1	2	2	0	0	0	1	0	0	2	2	3	1	1	1	1	1	1	2	1	1	2	1	1	1	1	1	1	1	1	2	2	1	1	2	1	1	2	1
458	412	1	30	Hunan	Hangzhou	1	1	3	2	2	1	1	1	0	0	1	0	0	0	1	2	1	1	1	1	1	1	1	2	2	1	2	2	1	1	1	1	2	1	1	2	2	1	2	2	2	1	2	1
459	443	1	30	Zhejiang	Hangzhou	1	1	2	2	2	1	1	1	1	0	0	0	0	0	1	1	1	3	1	1	1	1	1	2	2	1	2	2	1	2	1	1	2	3	3	2	2	1	1	2	3	1	2	1
460	245	1	40	Zhejiang	Zhuzhou	1	1	4	2	3	2	2	1	1	1	0	1	0	0	1	2	1	1	1	2	1	2	2	2	1	1	2	2	1	2	1	1	2	2	1	2	2	1	1	1	1	1	2	4
461	328	1	40	Zhejiang	Zhuzhou	1	1	4	2	2	1	2	1	1	0	1	1	0	0	1	2	1	1	1	2	1	2	2	2	1	1	2	2	1	2	1	1	2	1	1	2	2	1	1	1	1	2	2	4
462	681	1	40	Zhejiang	Zhuzhou	1	1	3	1	2	1	2	1	1	0	1	1	0	0	1	2	1	1	1	2	1	2	2	2	1	1	2	2	1	2	1	1	2	1	1	2	2	1	1	1	1	2	2	4
463	447	1	51	Zhejiang	Jishou	1	1	4	3	2	1	2	1	1	0	0	0	0	0	1	2	1	1	1	2	1	2	2	2	1	1	2	2	1	2	1	1	2	2	1	2	2	1	1	1	1	2	2	4
464	463	1	36	Zhejiang	Shaoxing	1	1	4	1	2	1	2	1	1	1	0	1	0	0	1	2	1	1	1	2	1	2	2	2	1	1	2	2	1	2	1	1	2	2	1	2	2	1	1	1	1	2	2	4
465	484	1	44	Hunan	Shaoxing	2	1	4	2	1	2	1	2	1	0	1	0	0	0	1	2	1	1	1	2	1	1	1	2	2	1	2	2	1	1	1	1	1	2	1	2	2	1	1	2	1	1	2	2
466	339	1	26	Zhejiang	Shaoxing	1	1	1	1	1	1	2	1	1	0	1	1	0	0	1	2	1	1	1	2	1	2	2	2	1	1	2	2	1	2	1	1	2	2	1	2	2	1	1	1	1	2	2	4
467	253	1	22	Zhejiang	Shaoxing	1	1	1	1	1	1	2	1	1	0	1	1	0	0	1	2	1	1	1	2	1	2	2	2	1	1	2	2	1	2	1	1	2	2	1	2	2	1	1	1	1	2	2	4
468	345	1	22	Zhejiang	Shaoxing	1	1	1	1	1	1	2	1	1	0	1	1	0	0	1	2	1	1	1	2	1	2	2	2	1	1	2	2	1	2	1	1	2	2	1	2	2	1	1	1	1	2	2	4
469	594	1	45	Hunan	Shaoxing	1	1	4	2	2	2	1	1	1	0	0	1	0	0	1	2	1	1	1	3	1	1	1	2	2	1	2	2	1	2	1	1	2	2	1	2	2	2	1	2	1	1	2	1
470	503	1	31	Hunan	Shaoxing	1	1	2	1	2	1	1	1	1	1	1	0	0	0	1	2	1	1	1	2	1	1	1	2	2	2	2	2	1	2	1	1	2	2	1	2	2	1	1	2	1	1	2	1
471	579	1	45	Hunan	Shaoxing	1	1	4	3	2	2	1	1	1	1	1	0	0	0	2	2	1	1	1	1	1	1	1	2	2	1	2	2	1	2	1	1	2	2	1	2	2	1	1	2	1	1	2	1
472	649	1	31	Hunan	Zhuzhou	1	1	2	1	2	1	1	1	1	1	0	0	0	0	1	2	1	1	1	1	1	1	1	2	2	1	2	2	1	2	1	1	2	3	1	2	2	1	1	2	1	1	2	1
473	382	1	32	Hunan	Hangzhou	1	1	3	1	2	1	3	2	0	0	0	0	0	1	2	2	1	1	1	1	1	1	1	2	2	2	2	2	1	1	1	3	1	2	1	2	1	2	1	1	1	1	2	2
474	281	1	30	Hunan	Shaoxing	1	1	2	1	2	1	1	2	1	0	0	1	0	0	1	2	1	1	1	1	1	1	1	2	2	1	2	2	1	1	1	1	2	2	1	2	2	1	1	2	1	1	2	1
475	402	1	22	Zhejiang	Hangzhou	1	1	1	1	2	1	1	2	1	1	1	1	0	0	1	2	1	1	1	1	1	1	1	2	1	1	1	1	1	1	1	1	1	2	1	2	2	1	1	1	1	1	2	2
476	169	1	51	Zhejiang	Ningbo	1	1	4	2	2	1	2	1	1	0	1	1	0	0	1	2	1	1	1	2	1	2	2	2	1	1	2	2	1	2	1	1	2	2	1	2	2	1	1	1	1	2	2	4
477	703	1	41	Hunan	Hangzhou	1	1	4	2	2	2	1	1	1	0	1	1	0	0	1	2	1	1	1	1	1	1	1	2	2	1	2	2	1	2	1	1	2	1	1	2	2	1	1	2	1	1	2	2
478	762	1	49	Hunan	Hangzhou	2	1	4	2	1	2	1	1	1	0	0	0	0	0	2	2	1	1	1	1	1	2	1	2	2	1	2	2	1	1	1	1	2	3	1	2	1	1	1	2	2	1	2	1
479	715	1	36	Zhejiang	Hangzhou	1	2	3	2	2	2	2	1	1	1	0	0	0	0	1	2	1	1	1	1	1	1	1	2	1	1	2	2	1	1	1	1	1	2	1	2	1	1	1	1	1	1	1	2
480	366	1	38	Zhejiang	Hangzhou	1	2	3	2	2	1	1	1	1	0	1	0	0	0	2	2	1	1	1	1	1	1	1	2	2	1	2	2	1	1	1	1	2	2	1	2	2	2	1	2	1	1	2	1
481	627	1	34	Zhejiang	Hangzhou	1	2	3	2	2	2	2	1	1	1	0	0	0	0	1	2	1	1	1	3	1	1	1	2	2	2	1	2	1	2	2	1	2	2	1	2	2	1	1	2	1	1	1	2
482	422	1	35	Zhejiang	Hangzhou	1	2	3	1	2	2	2	2	0	1	0	1	0	0	2	2	1	1	1	3	1	1	3	2	3	2	1	2	3	3	1	3	2	3	3	3	2	2	2	3	3	1	3	1
483	597	1	30	Zhejiang	Hangzhou	1	2	2	2	2	1	1	1	1	1	1	1	1	0	2	2	1	1	1	1	1	1	1	2	2	1	2	2	1	2	1	1	2	2	1	2	2	1	1	2	1	1	2	1
484	219	1	38	Zhejiang	Hangzhou	1	2	4	1	2	1	1	2	0	0	1	0	0	0	1	2	1	1	1	1	2	1	1	2	2	1	2	2	1	1	1	1	1	3	2	2	2	2	1	2	1	1	2	2
485	286	1	23	Zhejiang	Wenzhou	1	2	1	1	1	1	1	2	1	0	0	0	0	0	2	2	1	1	1	1	1	1	1	2	2	1	2	2	1	1	1	1	1	2	1	2	2	1	1	3	1	1	2	2
486	170	1	30	Zhejiang	Wenzhou	1	2	3	1	2	1	3	2	0	0	0	0	0	1	2	2	1	1	1	1	1	1	1	2	1	1	1	1	1	1	1	1	1	1	1	1	1	1	1	1	1	1	1	2
487	194	1	29	Zhejiang	Wenzhou	1	2	2	1	1	1	3	2	0	0	0	0	0	1	2	2	3	3	3	1	1	1	1	2	2	2	2	1	1	1	1	1	1	2	1	2	1	1	1	2	1	1	2	2
488	345	1	28	Zhejiang	Wenzhou	1	2	1	1	2	1	3	2	1	0	0	0	0	1	1	2	1	1	1	1	1	1	1	2	2	1	1	1	1	1	1	1	1	2	1	1	1	1	1	1	1	1	1	2
489	499	1	29	Zhejiang	Wenzhou	1	2	4	2	2	2	3	2	1	0	0	1	0	1	2	2	1	1	1	1	2	1	1	2	1	1	2	2	3	2	1	3	2	2	1	2	2	2	1	2	1	1	2	2
490	636	1	31	Zhejiang	Wenzhou	1	2	2	1	2	1	3	1	1	0	0	0	0	0	1	2	1	1	1	1	1	1	1	2	1	1	2	2	1	1	1	1	2	2	1	2	2	1	1	1	1	1	2	2
491	205	1	30	Zhejiang	Wenzhou	1	2	2	1	2	1	3	2	0	0	1	1	0	0	2	2	1	1	1	1	1	1	1	2	1	1	2	1	1	1	1	1	1	2	1	1	1	1	1	1	1	1	1	2
492	377	1	26	Zhejiang	Wenzhou	1	2	1	1	2	1	3	2	0	0	0	1	0	0	2	2	3	1	1	1	1	1	3	2	3	1	2	3	1	3	1	3	3	2	3	3	2	1	3	3	3	1	2	1
493	609	1	48	Zhejiang	Wenzhou	1	2	4	3	2	1	3	2	1	0	1	0	0	1	1	2	1	1	1	1	1	2	1	2	2	1	2	2	1	3	1	1	2	3	1	2	2	1	1	2	1	1	2	2
494	441	1	28	Zhejiang	Hangzhou	1	2	2	1	2	1	3	2	0	0	0	0	0	1	2	2	1	1	1	1	1	1	2	2	2	1	2	2	1	1	1	1	1	1	1	2	2	1	1	2	1	1	2	1
495	434	1	50	Zhejiang	Hangzhou	1	2	4	3	2	1	3	2	0	0	1	1	0	1	1	2	1	1	1	1	1	1	1	2	2	2	3	2	1	2	1	1	2	2	1	1	2	2	2	1	1	1	2	2
496	540	1	30	Zhejiang	Hangzhou	1	2	2	1	2	1	3	2	1	0	0	1	0	0	2	2	1	1	1	2	2	1	1	2	2	1	2	2	1	2	1	2	2	2	1	2	2	2	1	1	1	1	2	2
497	676	1	30	Zhejiang	Hangzhou	1	2	2	1	2	1	3	1	1	0	0	1	0	0	1	2	1	1	1	2	1	1	1	2	2	1	2	2	1	2	1	1	2	2	1	2	2	1	1	2	1	1	2	2
498	263	1	40	Zhejiang	Hangzhou	1	2	3	2	2	1	3	1	1	0	0	0	0	0	2	2	1	1	1	1	1	1	1	2	1	1	1	1	1	1	1	1	2	2	1	1	1	1	1	1	1	1	1	2
499	572	1	48	Zhejiang	Hangzhou	1	2	4	2	2	1	3	1	1	0	0	0	1	1	1	2	1	1	1	1	1	1	1	2	2	1	2	2	1	1	1	2	2	3	1	2	2	1	1	1	1	1	2	2
500	262	1	33	Zhejiang	Hangzhou	1	2	2	1	2	1	3	2	1	0	0	1	0	0	1	2	1	1	1	1	1	2	1	2	2	1	2	1	1	1	1	1	1	2	1	1	1	1	1	1	1	1	1	1
501	298	1	50	Zhejiang	Ningbo	1	2	4	2	2	1	3	1	1	0	0	0	0	0	1	2	1	1	1	1	1	1	1	2	1	1	1	1	1	1	1	1	1	2	1	2	1	1	1	1	1	1	1	1
502	263	1	26	Zhejiang	Ningbo	1	2	1	1	2	1	3	1	1	1	0	1	0	0	2	2	3	1	1	1	3	3	1	2	2	1	2	2	1	2	1	1	1	1	1	2	2	1	1	2	2	2	2	2
503	167	1	32	Zhejiang	Ningbo	1	2	2	2	2	1	3	1	1	0	0	0	0	0	1	2	1	1	1	1	1	1	1	2	2	1	2	2	1	1	1	1	2	3	1	2	1	1	1	1	1	1	1	1
504	328	1	29	Zhejiang	Ningbo	1	2	2	1	2	1	1	2	0	0	0	0	0	1	2	2	1	1	1	1	1	1	1	2	1	1	1	1	1	1	1	1	1	2	1	1	1	1	1	1	1	1	1	2
505	390	1	32	Zhejiang	Ningbo	1	2	2	1	2	1	1	1	1	1	0	0	0	0	2	2	1	1	1	1	1	1	1	2	1	1	1	1	1	1	1	1	1	3	1	1	1	1	1	1	1	1	1	1
506	448	1	24	Zhejiang	Ningbo	1	2	1	1	2	1	1	1	1	0	0	0	0	0	1	2	2	1	1	1	1	1	1	2	2	1	2	2	1	1	1	1	2	1	1	2	2	1	1	1	1	1	2	2
507	468	1	33	Zhejiang	Ningbo	1	2	3	2	2	1	3	2	0	0	0	0	0	1	2	2	1	1	1	1	1	1	1	2	1	1	2	2	1	1	1	1	1	2	1	2	2	1	1	2	1	1	2	1
508	426	1	35	Zhejiang	Ningbo	1	2	3	2	2	1	1	2	1	0	0	0	0	0	2	2	1	1	1	1	1	1	1	2	1	1	2	1	1	1	1	1	2	2	1	2	2	1	1	1	1	1	2	2
509	258	1	35	Zhejiang	Ningbo	1	2	3	2	2	1	1	2	1	0	0	0	0	0	2	2	1	1	1	1	1	1	1	2	2	1	2	2	1	1	1	1	2	2	1	2	2	1	1	2	1	1	2	2
510	592	1	28	Zhejiang	Ningbo	1	2	1	1	2	1	3	1	1	1	1	1	1	0	1	2	1	1	1	2	1	1	1	2	2	1	2	2	1	1	1	1	2	2	1	2	2	1	1	2	1	1	2	1
511	325	1	28	Zhejiang	Ningbo	1	2	1	1	2	1	1	1	1	1	1	1	0	0	2	1	1	1	1	1	1	1	1	2	2	1	2	2	1	1	1	1	1	2	1	1	1	1	1	1	1	1	2	1
512	318	1	38	Zhejiang	Ningbo	1	1	4	3	2	2	1	1	1	1	1	1	0	1	1	1	1	1	1	2	1	1	1	2	1	1	2	2	1	2	1	1	2	2	1	2	2	1	1	2	1	1	2	1
513	523	1	31	Zhejiang	Ningbo	1	2	2	2	2	1	1	1	1	0	0	1	1	0	2	2	1	1	1	2	1	1	1	2	2	1	2	2	3	2	1	1	2	2	1	2	2	1	1	2	1	1	2	1
514	549	1	40	Zhejiang	Ningbo	1	2	4	2	2	2	1	2	0	1	1	0	0	0	2	2	1	1	1	1	1	1	1	2	3	1	2	1	1	1	1	3	3	2	1	2	2	2	3	3	3	1	3	3
515	287	1	26	Zhejiang	Ningbo	1	2	1	1	1	1	1	1	1	0	0	0	0	0	1	2	1	1	1	1	1	1	1	2	1	1	2	2	1	1	1	1	1	2	1	1	1	1	1	1	1	1	1	1
516	180	1	40	Zhejiang	Ningbo	1	2	4	2	2	1	1	2	0	1	0	0	0	0	1	2	1	1	1	1	1	1	1	2	1	1	1	1	1	1	1	1	1	3	1	1	1	1	1	1	1	1	1	2
517	189	1	38	Zhejiang	Ningbo	1	2	2	2	2	1	2	2	1	0	0	0	0	1	2	2	3	3	1	1	1	1	1	2	1	1	1	1	1	1	1	1	1	3	1	1	1	1	1	1	1	1	1	1
518	307	1	24	Zhejiang	Ningbo	1	2	1	1	2	1	3	1	1	0	0	1	0	0	1	2	1	1	1	1	1	1	1	2	2	2	2	2	1	2	1	1	2	2	1	2	2	1	1	1	1	1	2	2
519	505	1	25	Zhejiang	Ningbo	1	2	1	1	2	1	1	1	0	0	0	0	1	0	2	2	1	1	1	1	1	1	1	2	3	1	2	2	1	3	1	3	1	2	3	3	2	3	1	3	3	3	3	1
520	231	1	37	Zhejiang	Ningbo	1	2	3	2	2	1	1	2	1	0	0	0	0	0	1	1	1	1	1	1	1	1	1	2	1	1	1	1	1	1	1	1	1	2	1	1	1	1	1	1	1	1	1	3
521	619	1	35	Zhejiang	Ningbo	1	2	3	1	2	1	1	1	1	0	0	0	0	0	1	2	1	1	1	2	1	1	1	2	2	1	2	2	1	2	1	1	2	3	1	2	2	1	1	1	1	1	2	1
522	601	1	47	Zhejiang	Ningbo	1	2	4	3	2	2	1	1	1	0	0	1	0	0	2	2	1	1	1	2	1	1	1	2	2	1	2	3	1	2	1	1	2	2	1	2	2	1	1	1	1	1	2	1
523	648	1	32	Zhejiang	Ningbo	1	2	3	2	2	1	1	1	1	0	0	1	0	0	2	2	1	1	1	2	1	1	1	2	2	1	2	2	1	2	1	1	2	2	1	2	2	1	1	1	1	1	2	1
524	640	1	32	Zhejiang	Ningbo	1	2	2	2	2	1	1	1	1	1	1	1	0	0	2	2	1	1	1	2	1	1	1	2	2	1	1	1	1	2	1	1	2	3	1	2	2	1	1	1	1	1	2	1
525	637	1	28	Zhejiang	Ningbo	1	2	2	1	2	1	1	1	1	1	1	1	0	0	2	2	1	1	1	2	1	1	1	2	2	1	2	3	1	3	1	1	2	2	1	2	2	1	1	1	1	1	2	1
526	656	1	40	Zhejiang	Ningbo	1	2	4	2	2	1	1	1	1	0	0	1	0	0	2	2	1	1	1	2	1	1	1	2	2	1	2	1	1	1	1	1	2	3	1	2	2	1	1	1	1	1	2	1
527	815	1	40	Zhejiang	Ningbo	1	2	4	1	1	1	1	1	1	1	0	1	0	0	2	2	1	1	1	2	1	1	1	2	2	1	2	1	1	1	1	1	2	2	1	2	2	1	1	1	1	1	1	2
528	1031	1	27	Zhejiang	Ningbo	1	2	1	1	2	1	1	1	1	0	1	1	0	0	1	2	1	1	1	2	1	1	1	2	2	1	2	2	1	1	1	1	2	3	1	2	2	2	1	2	1	1	2	1
529	430	1	32	Zhejiang	Ningbo	1	2	3	1	2	1	1	1	1	0	1	1	0	1	1	2	1	1	3	2	2	2	1	2	2	1	2	2	1	1	1	1	2	1	1	2	2	2	1	2	3	1	2	1
530	359	1	28	Zhejiang	Ningbo	1	2	1	1	1	1	1	2	1	1	1	1	1	0	1	1	1	1	1	1	1	1	1	2	2	1	2	2	1	1	1	1	2	2	1	2	2	1	1	2	1	1	2	2
531	415	1	30	Zhejiang	Ningbo	1	2	3	2	2	1	1	1	1	0	0	0	0	0	1	2	1	1	1	1	1	3	1	2	2	1	1	3	1	1	1	1	1	2	2	2	2	2	1	3	1	1	1	2
532	170	1	27	Zhejiang	Ningbo	1	1	1	1	2	1	1	2	0	0	0	1	0	0	2	2	1	1	1	2	1	1	1	2	2	1	2	2	1	1	1	1	2	2	2	2	2	2	1	1	1	1	2	1
533	473	1	32	Zhejiang	Ningbo	1	2	2	1	2	1	1	1	1	1	1	1	1	0	1	2	1	1	1	1	1	1	1	2	2	1	1	1	1	1	1	1	1	2	1	1	1	1	1	1	1	1	2	2
534	429	1	32	Zhejiang	Ningbo	1	2	2	1	2	1	1	2	1	1	1	1	0	0	2	2	1	1	1	1	1	1	1	2	1	1	1	1	1	1	1	1	1	2	1	1	1	1	1	1	1	1	1	2
535	406	1	28	Zhejiang	Ningbo	1	2	2	1	2	1	1	1	0	0	1	1	1	0	2	2	1	1	1	1	1	1	1	2	2	1	2	2	1	1	1	1	2	3	2	2	2	1	1	2	1	1	2	1
536	190	1	26	Zhejiang	Ningbo	1	2	1	1	2	1	3	2	0	0	0	0	1	0	2	2	1	1	1	1	1	1	1	2	1	1	1	1	1	1	1	1	1	2	1	2	2	1	1	2	1	1	2	1
537	423	1	33	Zhejiang	Ningbo	1	2	3	2	2	1	3	1	1	1	1	0	0	0	1	2	1	1	1	1	1	1	1	2	2	1	2	2	1	1	1	1	2	2	1	2	1	1	1	3	1	1	2	1
538	290	1	33	Zhejiang	Ningbo	1	2	2	2	2	1	3	2	1	0	0	0	0	0	1	2	1	1	1	1	1	1	1	2	1	1	1	1	1	1	1	1	1	2	1	1	1	1	1	1	1	1	1	1
539	496	1	24	Zhejiang	Ningbo	1	2	1	1	2	1	1	1	1	0	1	0	1	0	1	2	1	1	1	1	1	1	1	2	1	1	2	2	1	1	1	1	1	2	1	2	2	1	1	2	1	1	2	2
540	672	1	30	Zhejiang	Ningbo	1	2	2	1	2	1	3	1	1	0	0	0	0	0	2	2	1	1	1	1	1	1	1	2	1	1	1	1	1	1	1	1	1	1	1	1	1	1	1	1	1	1	1	2
541	241	1	28	Zhejiang	Ningbo	1	2	1	1	2	1	3	2	1	0	1	1	1	0	1	2	1	1	1	1	1	1	1	2	1	1	1	1	1	1	1	1	1	3	2	2	2	2	1	2	1	1	2	2
542	499	1	25	Zhejiang	Ningbo	1	2	1	1	1	1	1	1	1	0	0	0	0	0	1	2	1	1	1	1	1	2	1	2	2	1	2	2	1	1	1	2	2	2	1	2	2	1	1	1	1	1	2	3
543	165	1	37	Zhejiang	Wenzhou	1	2	3	2	2	1	2	2	0	0	0	1	0	0	2	2	3	3	3	3	3	3	3	2	3	3	3	3	3	3	3	3	3	2	3	3	3	3	3	3	3	3	3	2
544	221	1	34	Zhejiang	Wenzhou	1	2	3	1	2	1	2	2	0	0	0	0	0	1	2	2	3	3	3	3	3	3	3	2	3	3	3	3	3	3	3	3	1	3	1	1	3	3	3	3	3	3	3	2
545	496	1	31	Zhejiang	Wenzhou	1	2	2	2	2	1	2	1	1	1	1	1	1	0	1	2	1	1	1	1	1	1	1	2	2	1	2	2	1	1	1	1	2	3	1	2	1	1	1	2	1	1	2	1
546	213	1	25	Zhejiang	Wenzhou	1	2	1	1	2	1	2	1	1	0	0	0	0	0	1	2	1	1	1	1	1	1	1	2	2	2	2	2	1	1	1	1	1	1	1	2	2	1	1	2	1	1	2	2
547	390	1	25	Zhejiang	Shaoxing	1	2	1	1	1	1	2	1	1	0	0	0	0	0	2	2	1	1	1	1	1	1	1	2	3	1	2	2	1	1	1	1	2	2	1	2	2	1	1	3	1	1	1	3
548	229	1	26	Zhejiang	Changsha	1	2	1	1	2	1	2	1	0	0	0	0	1	0	1	2	1	1	1	1	1	1	1	2	1	1	1	1	1	1	1	1	2	1	1	2	2	1	1	2	1	1	2	2
549	435	1	34	Zhejiang	Changsha	1	2	3	2	2	1	2	1	0	0	0	1	0	0	2	2	1	1	1	1	1	1	1	2	2	1	1	2	1	1	1	1	2	1	1	2	2	1	1	2	1	1	2	1
550	247	1	27	Zhejiang	Changsha	1	2	1	1	1	1	2	1	1	1	1	0	0	0	1	1	1	1	1	1	1	1	1	2	2	1	1	2	1	1	1	1	1	1	1	2	2	1	2	1	1	1	1	1
551	590	1	32	Zhejiang	Changsha	1	2	2	1	2	1	2	2	1	0	0	0	0	0	1	2	3	1	1	1	1	3	3	2	1	1	1	1	1	3	3	3	1	1	1	2	1	1	1	3	1	3	3	3
552	563	1	38	Zhejiang	Changde	1	2	3	2	2	1	2	1	1	0	0	1	0	0	1	2	1	1	1	1	1	1	1	3	2	1	2	2	1	1	1	1	1	3	1	2	2	1	1	2	1	1	2	1
553	455	1	30	Zhejiang	Changsha	1	2	3	1	1	1	2	1	1	0	0	1	0	0	1	2	1	1	1	1	2	1	2	3	2	1	1	2	1	1	1	1	3	3	1	2	2	2	1	3	1	1	1	2
554	579	1	42	Zhejiang	Changsha	1	2	4	1	1	1	2	2	1	0	0	0	0	0	2	2	1	1	1	2	1	1	1	3	2	1	2	2	1	1	1	1	2	3	1	2	2	1	1	3	1	1	2	1
555	378	1	30	Zhejiang	Changsha	1	2	3	1	1	1	2	1	1	0	0	0	0	0	1	2	1	1	1	1	1	1	1	3	2	1	2	2	1	1	1	1	1	3	1	2	2	1	1	2	1	1	2	2
556	331	1	38	Zhejiang	Shaoyang	1	2	3	2	2	1	2	2	1	0	0	0	0	0	2	2	3	3	3	1	3	3	3	3	3	3	3	3	3	3	3	3	3	3	3	3	3	3	3	3	3	3	3	5
557	575	1	26	Zhejiang	Changde	1	2	1	1	2	1	2	2	1	1	1	1	0	0	1	2	1	1	1	3	1	1	1	3	2	3	2	2	1	3	1	1	1	2	1	2	2	1	1	1	1	1	2	2
558	325	1	23	Zhejiang	Changde	1	2	1	1	1	1	2	1	1	1	0	1	0	0	1	1	1	1	1	1	1	1	1	3	2	1	2	2	1	1	1	1	1	1	1	2	2	2	1	2	1	1	2	1
559	1026	1	31	Zhejiang	Changde	1	2	2	2	2	1	2	1	1	0	0	0	1	0	2	2	1	1	1	1	1	1	1	3	2	1	2	2	1	1	1	1	2	3	1	2	2	1	1	2	1	1	2	2
560	480	1	36	Zhejiang	Changde	1	2	3	1	2	1	2	1	1	0	1	1	0	0	1	1	1	1	1	1	1	1	2	3	2	2	2	2	1	1	1	1	1	2	1	1	1	1	1	1	1	1	1	3
561	221	1	50	Zhejiang	Chenzhou	1	2	4	2	1	1	2	2	1	0	1	0	0	0	2	2	1	1	1	1	1	1	3	3	1	1	1	1	1	1	1	1	1	3	1	2	2	3	1	3	3	3	3	1
562	331	1	32	Zhejiang	Wenzhou	1	2	2	2	2	2	1	1	1	0	0	0	0	0	1	2	1	1	1	2	1	1	1	3	2	1	2	2	1	1	1	1	2	2	1	2	2	1	1	2	1	1	2	1
563	332	1	33	Zhejiang	Loudi	1	2	3	1	1	1	2	2	0	0	0	1	0	0	2	2	1	1	1	1	1	1	1	3	2	1	1	1	1	1	1	1	1	2	1	1	1	1	1	1	1	1	2	1
564	488	1	32	Zhejiang	Wenzhou	1	2	2	2	2	1	1	1	1	0	1	0	0	0	1	2	1	1	1	1	1	1	1	3	2	1	2	2	2	1	1	1	1	3	1	2	1	1	1	2	1	1	2	2
565	420	1	38	Zhejiang	Loudi	1	2	3	2	2	1	2	1	1	0	0	0	1	0	2	2	1	1	1	1	1	1	1	3	2	2	2	2	1	1	1	1	2	3	2	1	2	1	3	3	3	1	2	1
566	587	1	35	Zhejiang	Taizhou	1	2	3	1	2	1	2	1	1	0	1	1	1	1	1	2	1	1	1	1	1	1	1	3	1	1	2	2	1	1	1	1	1	3	1	2	2	1	1	1	2	1	3	2
567	441	1	42	Zhejiang	Shaoyang	1	2	4	2	2	1	2	1	1	0	1	1	0	0	1	2	1	1	1	1	1	1	1	3	1	2	1	2	1	1	1	1	1	3	1	2	2	3	1	1	1	1	1	2
568	219	1	29	Zhejiang	Wenzhou	1	2	2	1	2	1	2	1	1	0	0	0	0	0	1	1	1	1	1	1	1	1	1	3	1	1	2	1	1	1	1	1	1	2	1	2	2	1	1	2	1	1	2	3
569	390	1	28	Zhejiang	Hangzhou	1	2	1	1	2	1	1	2	1	0	0	0	0	0	2	2	1	1	1	1	1	1	1	3	2	2	2	2	1	2	1	2	1	1	1	2	1	2	2	2	1	1	2	1
570	172	1	28	Zhejiang	Yueyang	1	2	2	2	2	1	1	1	1	1	0	0	0	0	2	2	1	1	1	1	1	1	1	3	2	1	2	2	1	2	1	1	1	2	1	2	1	1	1	1	1	1	2	1
571	344	1	31	Zhejiang	Yueyang	1	2	3	1	2	1	1	1	1	0	0	1	0	0	2	2	1	1	1	1	1	1	1	3	2	2	1	2	1	1	1	3	2	2	1	1	2	2	1	3	1	1	1	2
572	315	1	32	Zhejiang	Yueyang	1	2	3	1	2	1	1	2	0	0	1	0	1	0	2	2	1	1	1	1	1	1	1	3	3	3	1	1	3	1	1	1	2	2	3	1	1	1	1	1	1	1	3	3
573	539	1	27	Zhejiang	Yueyang	1	2	1	1	1	1	1	1	1	1	1	1	1	0	1	2	1	1	1	1	1	1	1	3	2	1	2	2	1	1	1	1	1	3	1	2	2	2	1	2	1	1	2	2
574	615	1	30	Zhejiang	Taizhou	1	2	2	1	1	1	1	1	1	1	1	1	0	0	1	2	1	2	1	1	1	1	1	3	2	1	2	2	1	1	1	1	2	3	1	2	2	1	1	2	1	1	2	1
575	225	1	27	Zhejiang	Hangzhou	1	2	2	1	2	1	1	2	1	1	1	0	0	0	1	2	1	1	1	1	1	1	1	3	1	1	1	1	1	1	1	1	1	3	1	2	2	1	1	2	1	1	1	2
576	316	1	25	Zhejiang	Zhuzhou	1	2	1	1	2	1	1	2	0	0	0	0	0	1	2	2	1	1	1	1	1	1	1	3	1	1	1	1	1	1	1	1	1	3	1	1	1	1	1	1	1	1	1	1
577	675	1	26	Zhejiang	Hangzhou	1	2	1	1	2	1	1	2	1	0	0	0	0	0	2	2	1	1	1	1	1	1	1	3	2	1	2	2	1	1	1	1	1	3	1	1	2	2	1	2	1	1	2	1
578	225	1	30	Zhejiang	Jishou	1	2	1	1	1	1	1	2	1	0	0	0	0	0	1	2	1	1	1	1	1	1	1	3	1	1	2	1	1	1	1	1	1	3	1	1	1	1	1	1	1	1	1	1
579	352	1	37	Zhejiang	Jishou	1	2	4	1	2	1	1	1	1	1	1	1	1	0	1	2	1	1	1	1	1	1	1	3	2	1	2	2	1	1	1	1	2	2	1	2	2	1	1	2	1	1	2	4
580	215	1	35	Zhejiang	Hangzhou	1	2	3	1	2	1	1	1	1	0	0	0	0	0	1	2	1	1	2	2	1	1	1	3	2	1	2	2	1	2	1	1	1	2	1	2	2	1	1	2	1	1	2	1
581	667	1	36	Zhejiang	Changsha	1	2	4	1	2	1	1	1	1	1	1	0	0	0	2	2	1	1	1	1	1	1	1	3	2	1	2	2	1	2	1	1	1	3	1	2	2	1	1	2	1	1	2	1
582	322	1	40	Zhejiang	Changsha	1	2	4	3	2	2	1	1	0	1	0	0	0	0	1	2	1	1	1	1	1	1	1	3	2	1	2	2	1	1	1	1	2	2	1	2	2	1	1	2	1	1	1	1
583	275	1	28	Zhejiang	Changsha	1	2	2	1	2	1	1	1	1	0	0	1	0	0	1	2	1	1	1	2	3	1	1	3	2	1	2	2	1	1	1	1	2	2	1	2	2	1	1	3	1	1	2	3
584	504	1	38	Zhejiang	Hangzhou	1	2	3	2	2	2	1	1	1	0	0	0	0	0	1	2	3	1	1	1	1	1	1	3	2	1	2	2	1	3	1	3	1	2	1	2	2	1	1	3	1	1	2	1
585	294	1	46	Zhejiang	Changsha	1	1	4	3	1	2	1	1	1	0	1	1	0	1	1	2	1	1	1	1	1	1	1	3	2	1	1	2	1	1	1	1	1	2	1	1	1	1	1	1	1	1	2	1
586	219	1	33	Hunan	Hangzhou	1	1	2	2	3	1	1	1	1	1	1	1	0	0	1	1	1	1	1	2	2	1	1	3	2	1	2	2	1	2	1	1	2	3	1	2	2	1	1	2	1	1	2	1
587	846	1	35	Hunan	Jishou	1	1	3	2	2	1	1	1	1	0	0	1	0	0	1	1	1	1	2	2	1	1	2	3	2	1	2	2	1	2	1	1	2	3	1	2	2	1	1	2	1	1	1	2
588	611	1	21	Hunan	Zhuzhou	3	2	4	3	3	2	3	2	0	0	0	0	0	1	2	2	2	1	1	1	2	1	2	3	1	2	1	2	2	2	2	2	1	1	2	1	1	2	2	1	2	2	2	5
589	415	1	31	Hunan	Shaoxing	1	1	2	1	2	1	1	1	1	1	1	1	0	0	1	1	1	2	2	2	1	1	2	3	2	1	2	2	1	2	1	1	2	2	1	2	2	1	1	2	1	1	2	2
590	285	1	25	Hunan	Changsha	1	1	1	1	2	1	1	1	1	1	1	1	1	0	1	1	1	1	2	2	1	1	2	3	2	1	2	2	1	1	2	2	2	2	1	2	2	1	1	2	1	1	2	1
591	352	1	26	Hunan	Yueyang	1	1	1	1	2	1	1	1	1	1	0	0	0	0	1	1	1	1	2	2	1	2	1	3	2	1	2	2	2	2	1	2	2	1	1	1	2	2	1	2	1	1	2	2
592	658	1	25	Hunan	Changsha	1	1	1	1	1	1	1	1	1	1	1	1	0	0	1	1	1	1	2	2	1	1	2	3	2	1	2	2	2	2	1	1	2	2	1	1	2	2	2	1	1	1	1	1
593	606	1	35	Hunan	Changsha	1	1	3	2	1	1	1	1	1	0	1	0	0	0	1	1	1	1	2	2	1	1	1	3	2	1	2	2	1	2	1	2	2	2	1	2	2	1	1	2	1	1	2	1
594	519	1	37	Hunan	Changsha	1	1	4	2	2	1	1	1	1	0	1	1	0	0	1	1	1	1	2	2	1	1	1	3	2	1	2	2	1	2	1	2	2	1	1	2	2	1	1	2	1	1	2	1
595	1102	1	38	Hunan	Taizhou	1	1	4	2	2	1	1	1	1	0	0	0	0	0	1	1	1	1	1	2	1	1	2	3	2	1	2	2	1	2	1	1	2	3	1	2	2	1	1	2	1	1	2	1
596	333	1	50	Hunan	Xiangtan	1	1	4	2	1	1	1	1	1	1	1	1	0	0	1	1	1	1	1	2	1	2	2	3	2	1	2	2	1	2	2	2	2	3	1	2	2	1	1	1	1	1	2	2
597	501	1	28	Hunan	Xiangtan	1	1	2	1	2	1	2	1	1	0	1	0	0	0	1	1	1	1	1	2	1	2	1	3	2	1	2	2	1	2	1	1	2	3	1	2	2	1	1	2	1	1	2	1
598	443	1	31	Hunan	Wenzhou	1	1	2	2	2	1	1	1	1	0	0	1	0	0	1	1	1	1	1	2	1	1	2	3	2	1	2	2	1	2	1	1	2	2	1	2	2	1	1	2	1	1	2	1
599	574	1	29	Hunan	Wenzhou	1	1	2	1	2	1	1	1	1	1	1	1	0	0	1	1	1	2	2	2	1	1	2	3	2	1	2	2	1	2	1	1	2	2	1	2	2	1	1	2	1	1	2	1
600	359	1	25	Hunan	Wenzhou	1	1	1	1	2	1	1	1	1	0	0	0	0	0	1	1	1	2	1	2	1	2	1	3	2	1	2	1	1	2	1	1	2	3	2	2	1	1	2	2	1	1	1	1
601	827	1	30	Hunan	Changde	1	1	2	1	2	1	1	1	1	0	1	0	0	0	1	1	1	2	1	2	1	1	1	3	2	1	2	2	1	1	1	1	2	3	1	2	2	2	1	2	1	1	2	1
602	367	1	27	Hunan	Zhuzhou	1	1	2	1	2	1	1	1	1	0	0	0	0	0	1	1	1	1	2	2	1	1	1	3	2	1	2	2	1	1	1	1	2	2	1	2	2	1	1	2	1	1	2	1
603	848	1	30	Hunan	Wenzhou	1	1	2	1	2	1	1	2	1	0	0	0	0	0	1	1	1	1	1	2	1	1	2	3	2	1	2	2	2	1	1	2	2	2	1	2	2	1	2	1	1	1	2	1
604	622	1	34	Hunan	Hangzhou	1	1	3	2	2	1	1	1	1	0	0	0	0	0	1	1	1	1	2	2	1	1	2	3	2	1	2	2	2	2	1	1	1	3	1	2	2	2	2	1	1	1	1	1
605	244	1	33	Hunan	Hangzhou	1	1	2	2	2	1	1	1	1	1	1	1	1	0	2	1	1	1	2	2	1	2	2	3	2	1	2	2	2	1	1	2	2	3	1	2	2	1	1	2	1	1	2	2
606	770	1	35	Hunan	Ningbo	1	1	3	2	2	1	1	1	1	0	1	1	0	0	1	1	1	1	2	2	1	1	1	3	2	1	2	2	1	2	1	1	2	3	1	2	2	1	1	2	1	1	2	1
607	463	1	35	Hunan	Ningbo	1	1	3	2	2	1	1	1	1	0	0	0	0	0	1	1	1	1	2	2	1	1	2	3	2	1	2	2	1	2	1	2	2	2	1	2	2	1	1	2	1	1	2	2
608	717	1	49	Hunan	Ningbo	1	1	4	2	2	1	1	1	1	0	0	0	0	1	1	1	1	1	2	2	1	2	2	3	2	1	1	2	1	2	1	1	1	3	1	2	2	1	2	1	1	1	1	2
609	573	1	32	Hunan	Ningbo	1	1	3	2	2	1	1	1	1	0	1	0	0	0	1	1	2	1	2	2	1	1	1	3	2	1	2	2	1	2	2	1	2	3	1	2	2	1	1	1	1	1	2	1
610	460	1	35	Hunan	Ningbo	1	1	3	2	2	1	1	1	1	0	1	1	0	0	1	1	1	2	2	2	1	1	1	3	2	1	2	2	1	1	2	2	2	3	1	2	2	1	1	2	1	1	2	1
[truncated: 16 more columns]
