# Supplementary material for: Ophthalmic nurses’ knowledge, attitude, and practice toward venous thromboembolic prevention: a dual-center cross-sectional survey
Source: PeerJ. 2023 Aug 28;11:e15947. doi: 10.7717/peerj.15947 (PMC10470452; doi:10.7717/peerj.15947)
Supplement: Supplemental Information 2 [file peerj-11-15947-s002.xlsx]

## Sheet: Sheet1
Codebook
	The socio-demographic section	1	2	3	4
	1.Gender	Female	Male
	4.Hospital level	Tertiary hospital	Secondary hospital	First-level hospital
	5.Hospital type	General hospital	Specialist hospital
	6.Service years	≤5	6~10	11~15	≥16
	7.Professional title	Primary	Intermediate	Senior
	8.Highest education attained	Associate degree and below	Bachelor’s degree	Master’s degree and above
	9.Position	Nurse	Head nurse
	10.Department	Inpatient department	Outpatient department	Operating room
	11.Previous VTE prevention training	Yes	No
	13.VTE prevention management in hospital	Yes	No
	14.Previous VTE nursing experience	Yes	No
	The socio-demographic section	0	1
	12(Hospital or department training )	No	Yes
	12(Out-of-hospital training or academic conferences)	No	Yes
	12(Guideline or literature reading )	No	Yes
	12(Internet)	No	Yes
	12(School education)	No	Yes
	12(Other)	No	Yes
	KAP	1	2	3	4	5
	K1-K27	True	False	Don't know
	A1-A5	Strongly agree	Agree	Uncertainty	Disagree	Strongly disagree
	P1-P12	Always	Often	Sometimes	Occasionally	Never
